# Supplementary material for: Leveraging Human Genetics to Estimate Clinical Risk Reductions Achievable by Inhibiting Factor XI
Source: PubMed Central journal article supplement — Stroke. 2019 Sep 27;50(11):3004–12. doi: 10.1161/STROKEAHA.119.026545 (PMC6824502; doi:10.1161/strokeaha.119.026545), 2019-09-27
Supplement: str-50-3004-s001.pdf [file str-50-3004-s001.pdf]

## **SUPPLEMENTAL MATERIAL**

### **Leveraging human genetics to estimate clinical risk reductions achievable by inhibiting Factor XI**

#### **Supplemental Methods**

##### **Definition of clinical endpoints in the UK Biobank**

The UK Biobank (UKB) is a population cohort of 500,000 subjects from the United Kingdom <sup>1</sup>. It combines deep phenotyping in the form of electronic health records (EHR) with genome-wide genotyping and imputation. Clinical endpoints for cross-sectional association analyses were derived from EHRs based on International Statistical Classification of Diseases and Related Health Problems, 10<sup>th</sup> revision (ICD10) codes (UKB data field 41202 and 41204), ICD9 codes (UKB data fields 41203 and 41205), OPCS Classification of Interventions and Procedures (V4) codes (UKB field 41210 and 41200), death registry (UKB data field 40001 and 40002) and self-reported baseline questionnaire diagnostic codes (UKB data field 20001 and 20002). The codes used for the phenotypic definitions of specific endpoints are listed in Supplementary Table I. For the special cases of ischemic stroke (UKB data field 42008) and myocardial infarction (UKB data field 42000), the UKB-provided “date of first occurrence” phenotypes were used. Primary phenotypes (Figure 2A in the main manuscript) were defined by thorough review of the available data fields and diagnostic codes by a clinical expert, secondary (PheWAS) phenotypes (supplemental Figure IV) were defined based on previously reported UKB PheWAS <sup>2</sup>. For investigating subgroups within UKB (e.g. atrial fibrillation patients), subgroups were defined based on baseline and follow-up information, i.e. a person classed as atrial fibrillation patient had a documented diagnosis of atrial fibrillation at baseline or at any point during the prospective follow-up period.

##### **Quality control of UK Biobank genotype data**

For sample quality control (QC) the following filters were applied based on information in the UKB sample QC file “\_002\_ukb\_sqc\_v2.txt”: a) samples with ethnicity other than white British (78,674 samples), b) samples with mismatch between reported and genetically inferred sex (378 samples) and c) samples with sex chromosomal aneuploidy (652 samples). In addition, we made use of UKB provided kinship coefficients generated by the KING software <sup>3</sup> to remove related samples. For each of 36,159 pairs of samples with 2<sup>nd</sup> degree relationship or closer (kinship coefficient >0.884), a single sample was excluded at random. After QC we retained 371,695 samples for further analysis. Genotypes were retrieved from the UKB Imputation V3 dataset, all variants under consideration passed a stringent INFO imputation quality check (INFO>0.99). Positions of genotype variants were given based on genome Build 37.

## **Analysis of predicted FXI loss-of-function variants**

For the analysis of FXI loss-of-function (LOF) variants, the genotype data was supplemented with variant calls from whole exome sequencing (WES) of 49,958 subjects in the UK Biobank (supplemental Figure I). We downloaded WES variant calls generated by the UK Biobank FE variant calling pipeline. Positions of WES variants were provided based on genome Build 38. To identify putative LOF variants in FXI we applied the tool Loftee (<https://github.com/konradjk/loftee>) to both genotype and WES variants. Only variants with high confidence (HC) LOF annotation for FXI from Loftee were retained. Manual review of the genotype cluster plots of the seven putative LOF variants identified in the genotype data led to the rejection of five variants due to insufficient separation of the genotype groups. The two genotyped FXI LOF variants retained were Affx-80273409 and rs121965066. In the WES data 19 putative LOF variants were identified (Table II). As a quality control we compared the consistency of LOF carrier status for the two LOF variants from the genotype data in the WES data. LOF carrier status was 100% concordant between genotype and WES datasets for Affx-80273409 (4:187201469:CTG/C) and rs121965066, i.e. all subjects that were minor allele carriers in the genotype data also carried the allele in the WES dataset (if included). In total we identified 477 putative FXI LOF allele carriers, 120 and 357 in the WES and genotype datasets respectively. Putative F11 LOF variants were analyzed separately in the WES and genotype datasets and subsequently integrated using a fixed-effect meta-analysis (supplemental Figure II).

## **Definition of time-to-event data for survival analysis**

Time-to-event data for subjects passing genotype QC was extracted from the UKB HES data set using the ICD10 codes in Table I. The observation period for each subject was set to from the date of the baseline visit to the date of the first event or the date of the last recorded diagnostic code in the dataset. Subjects with events before the baseline visit were excluded from the analysis.

## **Definition of the F11 activity genetic score**

To define a genetic instrument for F11 activity, we made use of publically available summary level data of recent large-scale GWAS studies. We focused on SNPs with independent effects and genome-wide significant effect at the F11 locus. Effect sizes listed below are always expressed with respect to the F11 activity lowering allele.

A genetic risk score for F11 activity was derived based on a recent meta GWAS of ~16000 subjects<sup>4</sup>. Log effect sizes for two genome-wide significant SNPs at the F11 locus, rs4253417 ( $\beta=-0.0735$ ,  $se=0.00248$ ,  $P=2.86e-193$ , effect allele: C) and rs4253421 ( $\beta=-0.0498$ ,  $se=0.00373$ ,  $P=1.25e-40$ , effect allele: G), were combined in a simple additive score (see main Methods). The

two SNPs are only weakly linked (LD  $r^2=0.096$  in UKB) and show independent effects on F11 activity in a conditional analysis<sup>4</sup>. rs4253421 is a proxy SNP for rs1593 (LD  $r^2=0.854$  in UKB). This genetic score was subsequently rescaled to a 30% increase in relative aPTT (see main Methods). This rescaling was achieved by dividing the FXI score for each individual 0.3. For prospective analysis of time-to-event data we also defined a binary score using the extreme tails of the FXI score distribution: the first group consisted of 60,629 subjects with no FXI activity lowering alleles (“no genetic FXI reduction”) and the second of the 49,637 subjects with a relative aPTT effect  $> 0.4$  (“strongest observed genetic FXI reduction”).

### **Additional effect estimates for stroke and MI**

To improve the power of the cross-sectional analysis, we integrated effect sizes of publically available GWAS summary datasets using fixed effect meta-analysis. For MI the CARDIoGRAMplusC4D<sup>5</sup> (<http://www.cardiogramplusc4d.org>) was used. For ischemic stroke we integrated data from the MEGASTROKE study<sup>6</sup> (<http://www.megastroke.org>). To combine the SNP-wise effects from these studies into a single score we a) harmonized effect alleles to the F11 activity lowering allele, b) rescaled the effect estimate to a 30% relative increase in aPTT based on a global aPTT mean of 29.0s in the ARIC study<sup>7</sup>, c) integrated the SNP-wise effects into a score using a simple fixed-effect meta-analysis. This last step was justified due to the lack of LD between the markers<sup>8</sup>. This yielded a single risk estimate on an aPTT scale that could straightforwardly be combined with the UK Biobank estimates by fixed effect meta-analysis. The same meta-analysis procedure was also used to perform combined association analysis of estimates for the ischemic stroke subtypes cardioembolic stroke, small vessel stroke and large artery stroke from the MEGASTROKE study<sup>6</sup>.

### **Statistical methods**

Association analyses were performed using the R statistical programming language v. 3.4.3. Logistic regressions were carried out using the build-in *glm* function while Cox proportional hazard (CPH) regressions analyses were performed with the *survival* package (vs. 2.42-3). Regressions were carried out with age at baseline, sex, genotyping platform and the first 10 principal components of the genotypes as covariates. Deviation of the proportional hazards assumption for the Cox model was checked using the *cox.zph* function (Schoenfeld Residuals test). No significant deviation was observed. Random and fixed effect meta-analysis were performed using the *rma* function from R package metafor (vs 2.0-0)<sup>9</sup>. Meta analyses of UK Biobank and MEGASTROKE/ CARDIoGRAMplusC4D consortia data was carried out using fixed-effect meta analysis. As a sensitivity analysis we also performed random-effects meta analysis, obtaining highly consistent results.

## Subgroup and Interaction analysis

The interaction analyses of venous thrombosis (VT) and ischaemic stroke (IS) consisted of three models for each of the 48 phenotypes tested. The subgroups for survival (Cox proportional hazard) and logistic regression analysis were defined by case status for the respective phenotype using both prevalent and incident diagnoses. Control of the false discovery rate (FDR) was achieved using the procedure by Benjamini & Yekutieli <sup>10</sup>.

For each phenotype we estimated three models:

- 1) Test for significant effect as a risk factor: phenotypes were tested separately as independent variables in Cox regression models for effect on VT or IS.
- 2) Test for association of the F11 genetic score within the subgroup of cases: a Cox regression for effect of the F11 genetic score on IS/VT only within the cases of each phenotype.
- 3) Interaction analysis: A Cox regression model that included case/control status of a phenotype as a covariate and included an interaction term between the F11 score and risk factor case/control status.

For all Cox regression models the validity of the proportional hazard assumption was confirmed using the Schoenfeld Residuals test. Complementary to the Cox regression analysis, we also performed the same workflow using logistic regression in a cross-sectional manner. The results of both approaches were comparable (Tables II, II).

## Comparison of absolute differences between survival curves for subgroups

For showing that the absolute difference in ischaemic stroke event rate is different for subjects with atrial fibrillation compared to subject without, we define the null hypothesis for a chosen time  $t$  (here:  $t = 6$  years) as:

$$C := S_{AF,gH}(t) - S_{AF,gL}(t) - S_{nAF,gH}(t) + S_{nAF,gL}(t) = 0,$$

where  $S_{AF,gH}(t)$  gives the survival rate of subjects with atrial fibrillation and the strongest observed genetic effect on FXI and where  $S_{nAF,gL}(t)$  represents the survival rate for subjects without atrial fibrillation and no genetic effect on FXI. The other terms are defined accordingly. Intuitively, this means that the difference between the survival rates for subjects with extreme genetic scores is identical for subjects with AF and subjects without AF under the null hypothesis.

This null hypothesis is assessed using a permutation test and p-values are derived based on the generated distribution of the test statistic under the null hypothesis <sup>11</sup>. For that, it is important to note that one special case under the null hypothesis is the situation that all four survival rates are equal. For the permutation test, the following steps are performed:

- 1) Calculate the absolute value of the realization of test statistic  $C$  (denoted as  $c$ ) for the given dataset by estimating the Kaplan-Meier curves for each group and extracting the observed survival rates at time  $t$ .
- 2) Permutate the group labels of the four groups (AF,gH; AF,gL; nAF,gH; nAF,gL)  $i = 1000000$  times. In each iterations, calculate the absolute value of the realization of the test statistic  $C$  for the permuted dataset (denoted as  $c_i$ ;  $i = 1, \dots, 1000000$ ).
- 3) Calculate the number of cases in which  $c_i > c$  and denote this number by  $k$ . The estimated p-value is then given by  $P = \frac{k+1}{i+1}$ .

The approach based on the covariate-adjusted Cox regression uses an identical procedure, only the estimation of the survival rates is then based on the Cox model equation.

### Calibration of clinical and genetic risk estimates

The first prerequisite for the risk calibration procedure is the availability of risk estimates from a genetic analyses and clinical studies for the same phenotype on an identical scale (aPTT in our case). Given that, a calibration factor can be estimated that quantifies the relative difference in risk impact of a genetically determined activity reduction and the effect of a temporary pharmacological target modulation. This calibration factor can then be applied to genetic risk estimates for other phenotypes to make predictions about the outcome of future trials.

A critical component of this procedure is the principled propagation of the uncertainty (i.e. standard errors) of the estimators involved. Let  $\beta_1$  and  $\beta_2$  be two independent effect estimators with standard deviations  $\sigma_1$  and  $\sigma_2$ . Then, the standard deviation  $\sigma_f$  of  $f = \frac{\beta_1}{\beta_2}$  or  $f = \beta_1\beta_2$  can be

approximated by  $\sigma_f \approx |f| \sqrt{\left(\frac{\sigma_1}{\beta_1}\right)^2 + \left(\frac{\sigma_2}{\beta_2}\right)^2}$ <sup>12</sup>. Similarly, for  $f = \beta_1 + \beta_2$  we obtain

$$\sigma_f = \sqrt{\sigma_1^2 + \sigma_2^2}.$$

For F11 specifically, we make use of a) clinical trial data for F11 inhibition in venous thromboembolism (VT) and b) genetic risk estimates for VT based on the aPTT score to anticipate the effect of F11 inhibition in a trial of ischemic stroke.

For the former, we leverage clinical Phase 2a trial data for the effect of two different dosages of an F11 antisense (F11-ASO) on VT risk after total knee arthroplasty (TKA)<sup>13</sup>.

The study compared the effect of F11-ASO against 40 mg of Enoxaparin.

Using the reported event counts, we calculated odds ratios (ORs) of 0.839 (CI 0.681 - 1.034) and 0.1 (CI 0.044 - 0.22) for 200mg and 300mg of F11-ASO respectively. To arrive at the desired comparison of F11-ASO vs. placebo, the estimates from<sup>13</sup> were combined with a VT risk estimate for Enoxaparin vs. Placebo of OR=0.27 (CI=0.19, 0.38) (supplemental Figure VII) from a fixed random effect meta-analysis of event counts of four trials<sup>14-17</sup> (retrieved from<sup>18</sup>) using standard indirect adjusted comparison methods for odds ratios<sup>19</sup>. This yielded final risk estimates

for F11-ASO vs. Placebo of OR=0.22 (CI 0.15- 0.33) and OR= 0.027 (CI 0.01-0.065) for 200mg and 300mg F11-ASO respectively.

The effect of the 200mg and 300mg dosages of F11-ASO on aPTT was measured in <sup>13</sup>. The relative increase in aPTT from day zero to day 36 (day before surgery) was ~20% (aPTT ratio 1.2) and 40% (aPTT ratio 1.4) for the 200mg and 300mg F11-ASO dosages respectively. To arrive at the final clinical VT risk estimate, the estimates for 200mg and 300mg F11-ASO were rescaled to a 100% relative aPTT increase by division through the respective relative aPTT effects and combined using a fixed effect meta-analysis. For a 30% increase in relative aPTT (i.e. a 1.3 fold change), this yielded an estimate of OR= 0.086 (CI 0.06-0.13) for the clinical VTE data. The calibration factor can now be estimated as a simple ratio of the clinical and genetic effect sizes for VT. Multiplication of the calibration factor with the genetic risk estimate of a different phenotype yields a prediction of the clinical effect for that endpoint.

## **Acknowledgement MEGASTROKE CONSORTIUM**

Rainer Malik <sup>1</sup>, Ganesh Chauhan <sup>2</sup>, Matthew Traylor <sup>3</sup>, Muralidharan Sargurupremraj <sup>4,5</sup>, Yukinori Okada <sup>6,7,8</sup>, Aniket Mishra <sup>4,5</sup>, Loes Rutten-Jacobs <sup>3</sup>, Anne-Katrin Giese <sup>9</sup>, Sander W van der Laan <sup>10</sup>, Solveig Gretarsdottir <sup>11</sup>, Christopher D Anderson <sup>12,13,14,14</sup>, Michael Chong <sup>15</sup>, Hieab HH Adams <sup>16,17</sup>, Tetsuro Ago <sup>18</sup>, Peter Almgren <sup>19</sup>, Philippe Amouyel <sup>20,21</sup>, Hakan Ay <sup>22,13</sup>, Traci M Bartz <sup>23</sup>, Oscar R Benavente <sup>24</sup>, Steve Bevan <sup>25</sup>, Giorgio B Boncoraglio <sup>26</sup>, Robert D Brown, Jr. <sup>27</sup>, Adam S Butterworth <sup>28,29</sup>, Caty Carrera <sup>30,31</sup>, Cara L Carty <sup>32,33</sup>, Daniel I Chasman <sup>34,35</sup>, Wei-Min Chen <sup>36</sup>, John W Cole <sup>37</sup>, Adolfo Correa <sup>38</sup>, Ioana Cotlarciuc <sup>39</sup>, Carlos Cruchaga <sup>40,41</sup>, John Danesh <sup>28,42,43,44</sup>, Paul IW de Bakker <sup>45,46</sup>, Anita L DeStefano <sup>47,48</sup>, Marcel den Hoed <sup>49</sup>, Qing Duan <sup>50</sup>, Stefan T Engelter <sup>51,52</sup>, Guido J Falcone <sup>53,54</sup>, Rebecca F Gottesman <sup>55</sup>, Raji P Grewal <sup>56</sup>, Vilmundur Gudnason <sup>57,58</sup>, Stefan Gustafsson <sup>59</sup>, Jeffrey Haessler <sup>60</sup>, Tamara B Harris <sup>61</sup>, Ahamad Hassan <sup>62</sup>, Aki S Havulinna <sup>63,64</sup>, Susan R Heckbert <sup>65</sup>, Elizabeth G Holliday <sup>66,67</sup>, George Howard <sup>68</sup>, Fang-Chi Hsu <sup>69</sup>, Hyacinth I Hyacinth <sup>70</sup>, M Arfan Ikram <sup>16</sup>, Erik Ingelsson <sup>71,72</sup>, Marguerite R Irvin <sup>73</sup>, Xueqiu Jian <sup>74</sup>, Jordi Jiménez-Conde <sup>75</sup>, Julie A Johnson <sup>76,77</sup>, J Wouter Jukema <sup>78</sup>, Masahiro Kanai <sup>6,7,79</sup>, Keith L Keene <sup>80,81</sup>, Brett M Kissela <sup>82</sup>, Dawn O Kleindorfer <sup>82</sup>, Charles Kooperberg <sup>60</sup>, Michiaki Kubo <sup>83</sup>, Leslie A Lange <sup>84</sup>, Carl D Langefeld <sup>85</sup>, Claudia Langenberg <sup>86</sup>, Lenore J Launer <sup>87</sup>, Jin-Moo Lee <sup>88</sup>, Robin Lemmens <sup>89,90</sup>, Didier Leys <sup>91</sup>, Cathryn M Lewis <sup>92,93</sup>, Wei-Yu Lin <sup>28,94</sup>, Arne G Lindgren <sup>95,96</sup>, Erik Lorentzen <sup>97</sup>, Patrik K Magnusson <sup>98</sup>, Jane Maguire <sup>99</sup>, Ani Manichaikul <sup>36</sup>, Patrick F McArdle <sup>100</sup>, James F Meschia <sup>101</sup>, Braxton D Mitchell <sup>100,102</sup>, Thomas H Mosley <sup>103,104</sup>, Michael A Nalls <sup>105,106</sup>, Toshiharu Ninomiya <sup>107</sup>, Martin J O'Donnell <sup>15,108</sup>, Bruce M Psaty <sup>109,110,111,112</sup>, Sara L Pulit <sup>113,45</sup>, Kristiina Rannikmäe <sup>114,115</sup>, Alexander P Reiner <sup>65,116</sup>, Kathryn M Rexrode <sup>117</sup>, Kenneth Rice <sup>118</sup>, Stephen S Rich <sup>36</sup>, Paul M Ridker <sup>34,35</sup>, Natalia S Rost <sup>9,13</sup>, Peter M Rothwell <sup>119</sup>, Jerome I Rotter <sup>120,121</sup>, Tatjana Rundek <sup>122</sup>, Ralph L Sacco

<sup>122</sup>, Saori Sakaue <sup>7,123</sup>, Michele M Sale <sup>124</sup>, Veikko Salomaa <sup>63</sup>, Bishwa R Sapkota <sup>125</sup>, Reinhold Schmidt <sup>126</sup>, Carsten O Schmidt <sup>127</sup>, Ulf Schminke <sup>128</sup>, Pankaj Sharma <sup>39</sup>, Agnieszka Slowik <sup>129</sup>, Cathie LM Sudlow <sup>114,115</sup>, Christian Tanislav <sup>130</sup>, Turgut Tatlisumak <sup>131,132</sup>, Kent D Taylor <sup>120,121</sup>, Vincent NS Thijs <sup>133,134</sup>, Gudmar Thorleifsson <sup>11</sup>, Unnur Thorsteinsdottir <sup>11</sup>, Steffen Tiedt <sup>1</sup>, Stella Trompet <sup>135</sup>, Christophe Tzourio <sup>5,136,137</sup>, Cornelia M van Duijn <sup>138,139</sup>, Matthew Walters <sup>140</sup>, Nicholas J Wareham <sup>86</sup>, Sylvia Wassertheil-Smoller <sup>141</sup>, James G Wilson <sup>142</sup>, Kerri L Wiggins <sup>109</sup>, Qiong Yang <sup>47</sup>, Salim Yusuf <sup>15</sup>, Najaf Amin <sup>16</sup>, Hugo S Aparicio <sup>185,48</sup>, Donna K Arnett <sup>186</sup>, John Attia <sup>187</sup>, Alexa S Beiser <sup>47,48</sup>, Claudine Berr <sup>188</sup>, Julie E Buring <sup>34,35</sup>, Mariana Bustamante <sup>189</sup>, Valeria Caso <sup>190</sup>, Yu-Ching Cheng <sup>191</sup>, Seung Hoan Choi <sup>192,48</sup>, Ayesha Chowhan <sup>185,48</sup>, Natalia Cullell <sup>31</sup>, Jean-François Dartigues <sup>193,194</sup>, Hossein Delavaran <sup>95,96</sup>, Pilar Delgado <sup>195</sup>, Marcus Dörr <sup>196,197</sup>, Gunnar Engström <sup>19</sup>, Ian Ford <sup>198</sup>, Wander S Gurpreet <sup>199</sup>, Anders Hamsten <sup>200,201</sup>, Laura Heitsch <sup>202</sup>, Atsushi Hozawa <sup>203</sup>, Laura Ibanez <sup>204</sup>, Andreea Ilinca <sup>95,96</sup>, Martin Ingelsson <sup>205</sup>, Motoki Iwasaki <sup>206</sup>, Rebecca D Jackson <sup>207</sup>, Katarina Jood <sup>208</sup>, Pekka Jousilahti <sup>63</sup>, Sara Kaffashian <sup>4,5</sup>, Lalit Kalra <sup>209</sup>, Masahiro Kamouchi <sup>210</sup>, Takanari Kitazono <sup>211</sup>, Olafur Kjartansson <sup>212</sup>, Manja Kloss <sup>213</sup>, Peter J Koudstaal <sup>214</sup>, Jerzy Krupinski <sup>215</sup>, Daniel L Labovitz <sup>216</sup>, Cathy C Laurie <sup>118</sup>, Christopher R Levi <sup>217</sup>, Linxin Li <sup>218</sup>, Lars Lind <sup>219</sup>, Cecilia M Lindgren <sup>220,221</sup>, Vasileios Lioutas <sup>222,48</sup>, Yong Mei Liu <sup>223</sup>, Oscar L Lopez <sup>224</sup>, Hirata Makoto <sup>225</sup>, Nicolas Martinez-Majander <sup>172</sup>, Koichi Matsuda <sup>225</sup>, Naoko Minegishi <sup>203</sup>, Joan Montaner <sup>226</sup>, Andrew P Morris <sup>227,228</sup>, Elena Muiño <sup>31</sup>, Martina Müller-Nurasyid <sup>229,230,231</sup>, Bo Norrving <sup>95,96</sup>, Soichi Ogishima <sup>203</sup>, Eugenio A Parati <sup>232</sup>, Leema Reddy Peddareddygar <sup>56</sup>, Nancy L Pedersen <sup>98,233</sup>, Joanna Pera <sup>129</sup>, Markus Perola <sup>63,234</sup>, Alessandro Pezzini <sup>235</sup>, Silvana Pileggi <sup>236</sup>, Raquel Rabionet <sup>237</sup>, Iolanda Riba-Llena <sup>30</sup>, Marta Ribasés <sup>238</sup>, Jose R Romero <sup>185,48</sup>, Jaume Roquer <sup>239,240</sup>, Anthony G Rudd <sup>241,242</sup>, Antti-Pekka Sarin <sup>243,244</sup>, Ralhan Sarju <sup>199</sup>, Chloe Sarnowski <sup>47,48</sup>, Makoto Sasaki <sup>245</sup>, Claudia L Satizabal <sup>185,48</sup>, Mamoru Satoh <sup>245</sup>, Naveed Sattar <sup>246</sup>, Norie Sawada <sup>206</sup>, Gerli Sibolt <sup>172</sup>, Ásgeir Sigurdsson <sup>247</sup>, Albert Smith <sup>248</sup>, Kenji Sobue <sup>245</sup>, Carolina Soriano-Tárraga <sup>240</sup>, Tara Stanne <sup>249</sup>, O Colin Stine <sup>250</sup>, David J Stott <sup>251</sup>, Konstantin Strauch <sup>229,252</sup>, Takako Takai <sup>203</sup>, Hideo Tanaka <sup>253,254</sup>, Kozo Tanno <sup>245</sup>, Alexander Teumer <sup>255</sup>, Liisa Tomppo <sup>172</sup>, Nuria P Torres-Aguila <sup>31</sup>, Emmanuel Touze <sup>256,257</sup>, Shoichiro Tsugane <sup>206</sup>, Andre G Uitterlinden <sup>258</sup>, Einar M Valdimarsson <sup>259</sup>, Sven J van der Lee <sup>16</sup>, Henry Völzke <sup>255</sup>, Kenji Wakai <sup>253</sup>, David Weir <sup>260</sup>, Stephen R Williams <sup>261</sup>, Charles DA Wolfe <sup>241,242</sup>, Quenna Wong <sup>118</sup>, Huichun Xu <sup>191</sup>, Taiki Yamaji <sup>206</sup>, Dharambir K Sanghera <sup>125,169,170</sup>, Olle Melander <sup>19</sup>, Christina Jern <sup>171</sup>, Daniel Strbian <sup>172,173</sup>, Israel Fernandez-Cadenas <sup>31,30</sup>, W T Longstreth, Jr <sup>174,65</sup>, Arndt Rolfs <sup>175</sup>, Jun Hata <sup>107</sup>, Daniel Woo <sup>82</sup>, Jonathan Rosand <sup>12,13,14</sup>, Guillaume Pare <sup>15</sup>, Jemma C Hopewell <sup>176</sup>, Danish Saleheen <sup>177</sup>, Kari Stefansson <sup>11,178</sup>, Bradford B Worrall <sup>179</sup>, Steven J Kittner <sup>37</sup>, Sudha Seshadri <sup>180,48</sup>, Myriam Fornage <sup>74,181</sup>, Hugh S Markus <sup>3</sup>, Joanna MM Howson <sup>28</sup>, Yoichiro Kamatani <sup>6,182</sup>, Stephanie Debette <sup>4,5</sup>, Martin Dichgans <sup>1,183,184</sup>

- 1 Institute for Stroke and Dementia Research (ISD), University Hospital, LMU Munich, Munich, Germany
- 2 Centre for Brain Research, Indian Institute of Science, Bangalore, India
- 3 Stroke Research Group, Division of Clinical Neurosciences, University of Cambridge, UK
- 4 INSERM U1219 Bordeaux Population Health Research Center, Bordeaux, France
- 5 University of Bordeaux, Bordeaux, France
- 6 Laboratory for Statistical Analysis, RIKEN Center for Integrative Medical Sciences, Yokohama, Japan
- 7 Department of Statistical Genetics, Osaka University Graduate School of Medicine, Osaka, Japan
- 8 Laboratory of Statistical Immunology, Immunology Frontier Research Center (WPI-IFReC), Osaka University, Suita, Japan.
- 9 Department of Neurology, Massachusetts General Hospital, Harvard Medical School, Boston, MA, USA
- 10 Laboratory of Experimental Cardiology, Division of Heart and Lungs, University Medical Center Utrecht, University of Utrecht, Utrecht, Netherlands
- 11 deCODE genetics/AMGEN inc, Reykjavik, Iceland
- 12 Center for Genomic Medicine, Massachusetts General Hospital (MGH), Boston, MA, USA
- 13 J. Philip Kistler Stroke Research Center, Department of Neurology, MGH, Boston, MA, USA
- 14 Program in Medical and Population Genetics, Broad Institute, Cambridge, MA, USA
- 15 Population Health Research Institute, McMaster University, Hamilton, Canada
- 16 Department of Epidemiology, Erasmus University Medical Center, Rotterdam, Netherlands
- 17 Department of Radiology and Nuclear Medicine, Erasmus University Medical Center, Rotterdam, Netherlands
- 18 Department of Medicine and Clinical Science, Graduate School of Medical Sciences, Kyushu University, Fukuoka, Japan
- 19 Department of Clinical Sciences, Lund University, Malmö, Sweden
- 20 Univ. Lille, Inserm, Institut Pasteur de Lille, LabEx DISTALZ-UMR1167, Risk factors and molecular determinants of aging-related diseases, F-59000 Lille, France
- 21 Centre Hosp. Univ Lille, Epidemiology and Public Health Department, F-59000 Lille, France
- 22 AA Martinos Center for Biomedical Imaging, Department of Radiology, Massachusetts General Hospital, Harvard Medical School, Boston, MA, USA
- 23 Cardiovascular Health Research Unit, Departments of Biostatistics and Medicine, University of Washington, Seattle, WA, USA



- 24 Division of Neurology, Faculty of Medicine, Brain Research Center, University of British Columbia, Vancouver, Canada
- 25 School of Life Science, University of Lincoln, Lincoln, UK
- 26 Department of Cerebrovascular Diseases, Fondazione IRCCS Istituto Neurologico "Carlo Besta", Milano, Italy
- 27 Department of Neurology, Mayo Clinic Rochester, Rochester, MN, USA
- 28 MRC/BHF Cardiovascular Epidemiology Unit, Department of Public Health and Primary Care, University of Cambridge, Cambridge, UK
- 29 The National Institute for Health Research Blood and Transplant Research Unit in Donor Health and Genomics, University of Cambridge, UK
- 30 Neurovascular Research Laboratory, Vall d'Hebron Institut of Research, Neurology and Medicine Departments-Universitat Autònoma de Barcelona, Vall d'Hebrón Hospital, Barcelona, Spain
- 31 Stroke Pharmacogenomics and Genetics, Fundacio Docència i Recerca MutuaTerrassa, Terrassa, Spain
- 32 Children's Research Institute, Children's National Medical Center, Washington, DC, USA
- 33 Center for Translational Science, George Washington University, Washington, DC, USA
- 34 Division of Preventive Medicine, Brigham and Women's Hospital, Boston, MA, USA
- 35 Harvard Medical School, Boston, MA, USA
- 36 Center for Public Health Genomics, Department of Public Health Sciences, University of Virginia, Charlottesville, VA, USA
- 37 Department of Neurology, University of Maryland School of Medicine and Baltimore VAMC, Baltimore, MD, USA
- 38 Departments of Medicine, Pediatrics and Population Health Science, University of Mississippi Medical Center, Jackson, MS, USA
- 39 Institute of Cardiovascular Research, Royal Holloway University of London, UK & Ashford and St Peters Hospital, Surrey UK
- 40 Department of Psychiatry, The Hope Center Program on Protein Aggregation and Neurodegeneration (HPAN), Washington University, School of Medicine, St. Louis, MO, USA
- 41 Department of Developmental Biology, Washington University School of Medicine, St. Louis, MO, USA
- 42 NIHR Blood and Transplant Research Unit in Donor Health and Genomics, Department of Public Health and Primary Care, University of Cambridge, Cambridge, UK
- 43 Wellcome Trust Sanger Institute, Wellcome Trust Genome Campus, Hinxton, Cambridge, UK
- 44 British Heart Foundation, Cambridge Centre of Excellence, Department of

Medicine, University of Cambridge, Cambridge, UK  
45 Department of Medical Genetics, University Medical Center Utrecht, Utrecht, Netherlands  
46 Department of Epidemiology, Julius Center for Health Sciences and Primary Care, University Medical Center Utrecht, Utrecht, Netherlands  
47 Boston University School of Public Health, Boston, MA, USA  
48 Framingham Heart Study, Framingham, MA, USA  
49 Department of Immunology, Genetics and Pathology and Science for Life Laboratory, Uppsala University, Uppsala, Sweden  
50 Department of Genetics, University of North Carolina, Chapel Hill, NC, USA  
51 Department of Neurology and Stroke Center, Basel University Hospital, Switzerland  
52 Neurorehabilitation Unit, University and University Center for Medicine of Aging and Rehabilitation Basel, Felix Platter Hospital, Basel, Switzerland  
53 Department of Neurology, Yale University School of Medicine, New Haven, CT, USA  
54 Program in Medical and Population Genetics, The Broad Institute of Harvard and MIT, Cambridge, MA, USA  
55 Department of Neurology, Johns Hopkins University School of Medicine, Baltimore, MD, USA  
56 Neuroscience Institute, SF Medical Center, Trenton, NJ, USA  
57 Icelandic Heart Association Research Institute, Kopavogur, Iceland  
58 University of Iceland, Faculty of Medicine, Reykjavik, Iceland  
59 Department of Medical Sciences, Molecular Epidemiology and Science for Life Laboratory, Uppsala University, Uppsala, Sweden  
60 Division of Public Health Sciences, Fred Hutchinson Cancer Research Center, Seattle, WA, USA  
61 Laboratory of Epidemiology and Population Science, National Institute on Aging, National Institutes of Health, Bethesda, MD, USA  
62 Department of Neurology, Leeds General Infirmary, Leeds Teaching Hospitals NHS Trust, Leeds, UK  
63 National Institute for Health and Welfare, Helsinki, Finland  
64 FIMM - Institute for Molecular Medicine Finland, Helsinki, Finland  
65 Department of Epidemiology, University of Washington, Seattle, WA, USA  
66 Public Health Stream, Hunter Medical Research Institute, New Lambton, Australia  
67 Faculty of Health and Medicine, University of Newcastle, Newcastle, Australia  
68 School of Public Health, University of Alabama at Birmingham, Birmingham, AL, USA  
69 Department of Biostatistical Sciences, Wake Forest School of Medicine, Winston-Salem, NC, USA  
70 Aflac Cancer and Blood Disorder Center, Department of Pediatrics, Emory

University School of Medicine, Atlanta, GA, USA

71 Department of Medicine, Division of Cardiovascular Medicine, Stanford University School of Medicine, CA, USA

72 Department of Medical Sciences, Molecular Epidemiology and Science for Life Laboratory, Uppsala University, Uppsala, Sweden

73 Epidemiology, School of Public Health, University of Alabama at Birmingham, USA

74 Brown Foundation Institute of Molecular Medicine, University of Texas Health Science Center at Houston, Houston, TX, USA

75 Neurovascular Research Group (NEUVAS), Neurology Department, Institut Hospital del Mar d'Investigació Mèdica, Universitat Autònoma de Barcelona, Barcelona, Spain

76 Department of Pharmacotherapy and Translational Research and Center for Pharmacogenomics, University of Florida, College of Pharmacy, Gainesville, FL, USA

77 Division of Cardiovascular Medicine, College of Medicine, University of Florida, Gainesville, FL, USA

78 Department of Cardiology, Leiden University Medical Center, Leiden, the Netherlands

79 Program in Bioinformatics and Integrative Genomics, Harvard Medical School, Boston, MA, USA

80 Department of Biology, East Carolina University, Greenville, NC, USA

81 Center for Health Disparities, East Carolina University, Greenville, NC, USA

82 University of Cincinnati College of Medicine, Cincinnati, OH, USA

83 RIKEN Center for Integrative Medical Sciences, Yokohama, Japan

84 Department of Medicine, University of Colorado Denver, Anschutz Medical Campus, Aurora, CO, USA

85 Center for Public Health Genomics and Department of Biostatistical Sciences, Wake Forest School of Medicine, Winston-Salem, NC, USA

86 MRC Epidemiology Unit, University of Cambridge School of Clinical Medicine, Institute of Metabolic Science, Cambridge Biomedical Campus, Cambridge, UK

87 Intramural Research Program, National Institute on Aging, National Institutes of Health, Bethesda, MD, USA

88 Department of Neurology, Radiology, and Biomedical Engineering, Washington University School of Medicine, St. Louis, MO, USA

89 KU Leuven – University of Leuven, Department of Neurosciences, Experimental Neurology, Leuven, Belgium

90 VIB Center for Brain & Disease Research, University Hospitals Leuven, Department of Neurology, Leuven, Belgium

91 Univ.-Lille, INSERM U 1171. CHU Lille. Lille, France

92 Department of Medical and Molecular Genetics, King's College London, London, UK

- 93 SGDP Centre, Institute of Psychiatry, Psychology & Neuroscience, King's College London, London, UK
- 94 Northern Institute for Cancer Research, Paul O'Gorman Building, Newcastle University, Newcastle, UK
- 95 Department of Clinical Sciences Lund, Neurology, Lund University, Lund, Sweden
- 96 Department of Neurology and Rehabilitation Medicine, Skåne University Hospital, Lund, Sweden
- 97 Bioinformatics Core Facility, University of Gothenburg, Gothenburg, Sweden
- 98 Department of Medical Epidemiology and Biostatistics, Karolinska Institutet, Stockholm, Sweden
- 99 University of Technology Sydney, Faculty of Health, Ultimo, Australia
- 100 Department of Medicine, University of Maryland School of Medicine, MD, USA
- 101 Department of Neurology, Mayo Clinic, Jacksonville, FL, USA
- 102 Geriatrics Research and Education Clinical Center, Baltimore Veterans Administration Medical Center, Baltimore, MD, USA
- 103 Division of Geriatrics, School of Medicine, University of Mississippi Medical Center, Jackson, MS, USA
- 104 Memory Impairment and Neurodegenerative Dementia Center, University of Mississippi Medical Center, Jackson, MS, USA
- 105 Laboratory of Neurogenetics, National Institute on Aging, National institutes of Health, Bethesda, MD, USA
- 106 Data Tecnica International, Glen Echo MD, USA
- 107 Department of Epidemiology and Public Health, Graduate School of Medical Sciences, Kyushu University, Fukuoka, Japan
- 108 Clinical Research Facility, Department of Medicine, NUI Galway, Galway, Ireland
- 109 Cardiovascular Health Research Unit, Department of Medicine, University of Washington, Seattle, WA, USA
- 110 Department of Epidemiology, University of Washington, Seattle, WA
- 111 Department of Health Services, University of Washington, Seattle, WA, USA
- 112 Kaiser Permanente Washington Health Research Institute, Seattle, WA, USA
- 113 Brain Center Rudolf Magnus, Department of Neurology, University Medical Center Utrecht, Utrecht, The Netherlands
- 114 Usher Institute of Population Health Sciences and Informatics, University of Edinburgh, Edinburgh, UK
- 115 Centre for Clinical Brain Sciences, University of Edinburgh, Edinburgh, UK
- 116 Fred Hutchinson Cancer Research Center, University of Washington, Seattle, WA, USA
- 117 Department of Medicine, Brigham and Women's Hospital, Boston, MA, USA
- 118 Department of Biostatistics, University of Washington, Seattle, WA, USA
- 119 Nuffield Department of Clinical Neurosciences, University of Oxford, UK

- 120 Institute for Translational Genomics and Population Sciences, Los Angeles  
Biomedical Research Institute at Harbor-UCLA Medical Center, Torrance, CA, USA
- 121 Division of Genomic Outcomes, Department of Pediatrics, Harbor-UCLA Medical  
Center, Torrance, CA, USA
- 122 Department of Neurology, Miller School of Medicine, University of Miami,  
Miami, FL, USA
- 123 Department of Allergy and Rheumatology, Graduate School of Medicine, the  
University of Tokyo, Tokyo, Japan
- 124 Center for Public Health Genomics, University of Virginia, Charlottesville, VA,  
USA
- 125 Department of Pediatrics, College of Medicine, University of Oklahoma Health  
Sciences Center, Oklahoma City, OK, USA
- 126 Department of Neurology, Medical University of Graz, Graz, Austria
- 127 University Medicine Greifswald, Institute for Community Medicine, SHIP-KEF,  
Greifswald, Germany
- 128 University Medicine Greifswald, Department of Neurology, Greifswald,  
Germany
- 129 Department of Neurology, Jagiellonian University, Krakow, Poland
- 130 Department of Neurology, Justus Liebig University, Giessen, Germany
- 131 Department of Clinical Neurosciences/Neurology, Institute of Neuroscience and  
Physiology, Sahlgrenska Academy at University of Gothenburg, Gothenburg, Sweden
- 132 Sahlgrenska University Hospital, Gothenburg, Sweden
- 133 Stroke Division, Florey Institute of Neuroscience and Mental Health, University  
of Melbourne, Heidelberg, Australia
- 134 Austin Health, Department of Neurology, Heidelberg, Australia
- 135 Department of Internal Medicine, Section Gerontology and Geriatrics, Leiden  
University Medical Center, Leiden, the Netherlands
- 136 INSERM U1219, Bordeaux, France
- 137 Department of Public Health, Bordeaux University Hospital, Bordeaux, France
- 138 Genetic Epidemiology Unit, Department of Epidemiology, Erasmus University  
Medical Center Rotterdam, Netherlands
- 139 Center for Medical Systems Biology, Leiden, Netherlands
- 140 School of Medicine, Dentistry and Nursing at the University of Glasgow,  
Glasgow, UK
- 141 Department of Epidemiology and Population Health, Albert Einstein College of  
Medicine, NY, USA
- 142 Department of Physiology and Biophysics, University of Mississippi Medical  
Center, Jackson, MS, USA
- 143 A full list of members and affiliations appears in the Supplementary Note
- 144 Department of Human Genetics, McGill University, Montreal, Canada
- 145 Department of Pathophysiology, Institute of Biomedicine and Translation

Medicine, University of Tartu, Tartu, Estonia  
146 Department of Cardiac Surgery, Tartu University Hospital, Tartu, Estonia  
147 Clinical Gene Networks AB, Stockholm, Sweden  
148 Department of Genetics and Genomic Sciences, The Icahn Institute for Genomics and Multiscale Biology Icahn School of Medicine at Mount Sinai, New York, NY , USA  
149 Department of Pathophysiology, Institute of Biomedicine and Translation Medicine, University of Tartu, Biomeedikum, Tartu, Estonia  
150 Integrated Cardio Metabolic Centre, Department of Medicine, Karolinska Institutet, Karolinska Universitetssjukhuset, Huddinge, Sweden.  
151 Clinical Gene Networks AB, Stockholm, Sweden  
152 Sorbonne Universités, UPMC Univ. Paris 06, INSERM, UMR\_S 1166, Team Genomics & Pathophysiology of Cardiovascular Diseases, Paris, France  
153 ICAN Institute for Cardiometabolism and Nutrition, Paris, France  
154 Department of Biomedical Engineering, University of Virginia, Charlottesville, VA, USA  
155 Group Health Research Institute, Group Health Cooperative, Seattle, WA, USA  
156 Seattle Epidemiologic Research and Information Center, VA Office of Research and Development, Seattle, WA, USA  
157 Cardiovascular Research Center, Massachusetts General Hospital, Boston, MA, USA  
158 Department of Medical Research, Bærum Hospital, Vestre Viken Hospital Trust, Gjøttum, Norway  
159 Saw Swee Hock School of Public Health, National University of Singapore and National University Health System, Singapore  
160 National Heart and Lung Institute, Imperial College London, London, UK  
161 Department of Gene Diagnostics and Therapeutics, Research Institute, National Center for Global Health and Medicine, Tokyo, Japan  
162 Department of Epidemiology, Tulane University School of Public Health and Tropical Medicine, New Orleans, LA, USA  
163 Department of Cardiology, University Medical Center Groningen, University of Groningen, Netherlands  
164 MRC-PHE Centre for Environment and Health, School of Public Health, Department of Epidemiology and Biostatistics, Imperial College London, London, UK  
165 Department of Epidemiology and Biostatistics, Imperial College London, London, UK  
166 Department of Cardiology, Ealing Hospital NHS Trust, Southall, UK  
167 National Heart, Lung and Blood Research Institute, Division of Intramural Research, Population Sciences Branch, Framingham, MA, USA  
168 A full list of members and affiliations appears at the end of the manuscript  
169 Department of Pharmaceutical Sciences, College of Pharmacy, University of

Oklahoma Health Sciences Center, Oklahoma City, OK, USA  
170 Oklahoma Center for Neuroscience, Oklahoma City, OK, USA  
171 Department of Pathology and Genetics, Institute of Biomedicine, The Sahlgrenska Academy at University of Gothenburg, Gothenburg, Sweden  
172 Department of Neurology, Helsinki University Hospital, Helsinki, Finland  
173 Clinical Neurosciences, Neurology, University of Helsinki, Helsinki, Finland  
174 Department of Neurology, University of Washington, Seattle, WA, USA  
175 Albrecht Kossel Institute, University Clinic of Rostock, Rostock, Germany  
176 Clinical Trial Service Unit and Epidemiological Studies Unit, Nuffield Department of Population Health, University of Oxford, Oxford, UK  
177 Department of Genetics, Perelman School of Medicine, University of Pennsylvania, PA, USA  
178 Faculty of Medicine, University of Iceland, Reykjavik, Iceland  
179 Departments of Neurology and Public Health Sciences, University of Virginia School of Medicine, Charlottesville, VA, USA  
180 Department of Neurology, Boston University School of Medicine, Boston, MA, USA  
181 Human Genetics Center, University of Texas Health Science Center at Houston, Houston, TX, USA  
182 Center for Genomic Medicine, Kyoto University Graduate School of Medicine, Kyoto, Japan  
183 Munich Cluster for Systems Neurology (SyNergy), Munich, Germany  
184 German Center for Neurodegenerative Diseases (DZNE), Munich, Germany  
185 Boston University School of Medicine, Boston, MA, USA  
186 University of Kentucky College of Public Health, Lexington, KY, USA  
187 University of Newcastle and Hunter Medical Research Institute, New Lambton, Australia  
188 Univ. Montpellier, Inserm, U1061, Montpellier, France  
189 Centre for Research in Environmental Epidemiology, Barcelona, Spain  
190 Department of Neurology, Università degli Studi di Perugia, Umbria, Italy  
191 Department of Medicine, University of Maryland School of Medicine, Baltimore, MD, USA  
192 Broad Institute, Cambridge, MA, USA  
193 Univ. Bordeaux, Inserm, Bordeaux Population Health Research Center, UMR 1219, Bordeaux, France  
194 Bordeaux University Hospital, Department of Neurology, Memory Clinic, Bordeaux, France  
195 Neurovascular Research Laboratory. Vall d'Hebron Institut of Research, Neurology and Medicine Departments-Universitat Autònoma de Barcelona. Vall d'Hebrón Hospital, Barcelona, Spain  
196 University Medicine Greifswald, Department of Internal Medicine B, Greifswald,

Germany

197 DZHK, Greifswald, Germany

198 Robertson Center for Biostatistics, University of Glasgow, Glasgow, UK

199 Hero DMC Heart Institute, Dayanand Medical College & Hospital, Ludhiana, India

200 Atherosclerosis Research Unit, Department of Medicine Solna, Karolinska Institutet, Stockholm, Sweden

201 Karolinska Institutet, Stockholm, Sweden

202 Division of Emergency Medicine, and Department of Neurology, Washington University School of Medicine, St. Louis, MO, USA

203 Tohoku Medical Megabank Organization, Sendai, Japan

204 Department of Psychiatry, Washington University School of Medicine, St. Louis, MO, USA

205 Department of Public Health and Caring Sciences / Geriatrics, Uppsala University, Uppsala, Sweden

206 Epidemiology and Prevention Group, Center for Public Health Sciences, National Cancer Center, Tokyo, Japan

207 Department of Internal Medicine and the Center for Clinical and Translational Science, The Ohio State University, Columbus, OH, USA

208 Institute of Neuroscience and Physiology, the Sahlgrenska Academy at University of Gothenburg, Goteborg, Sweden

209 Department of Basic and Clinical Neurosciences, King's College London, London, UK

210 Department of Health Care Administration and Management, Graduate School of Medical Sciences, Kyushu University, Japan

211 Department of Medicine and Clinical Science, Graduate School of Medical Sciences, Kyushu University, Japan

212 Landspítali National University Hospital, Departments of Neurology & Radiology, Reykjavik, Iceland

213 Department of Neurology, Heidelberg University Hospital, Germany

214 Department of Neurology, Erasmus University Medical Center

215 Hospital Universitari Mutua Terrassa, Terrassa (Barcelona), Spain

216 Albert Einstein College of Medicine, Montefiore Medical Center, New York, NY, USA

217 John Hunter Hospital, Hunter Medical Research Institute and University of Newcastle, Newcastle, NSW, Australia

218 Centre for Prevention of Stroke and Dementia, Nuffield Department of Clinical Neurosciences, University of Oxford, UK

219 Department of Medical Sciences, Uppsala University, Uppsala, Sweden

220 Genetic and Genomic Epidemiology Unit, Wellcome Trust Centre for Human Genetics, University of Oxford, Oxford, UK



- 221 The Wellcome Trust Centre for Human Genetics, Oxford, UK
- 222 Beth Israel Deaconess Medical Center, Boston, MA, USA
- 223 Wake Forest School of Medicine, Wake Forest, NC, USA
- 224 Department of Neurology, University of Pittsburgh, Pittsburgh, PA, USA
- 225 BioBank Japan, Laboratory of Clinical Sequencing, Department of Computational biology and medical Sciences, Graduate school of Frontier Sciences, The University of Tokyo, Tokyo, Japan
- 226 Neurovascular Research Laboratory, Vall d'Hebron Institut of Research, Neurology and Medicine Departments-Universitat Autònoma de Barcelona. Vall d'Hebrón Hospital, Barcelona, Spain
- 227 Department of Biostatistics, University of Liverpool, Liverpool, UK
- 228 Wellcome Trust Centre for Human Genetics, University of Oxford, Oxford, UK
- 229 Institute of Genetic Epidemiology, Helmholtz Zentrum München - German Research Center for Environmental Health, Neuherberg, Germany
- 230 Department of Medicine I, Ludwig-Maximilians-Universität, Munich, Germany
- 231 DZHK (German Centre for Cardiovascular Research), partner site Munich Heart Alliance, Munich, Germany
- 232 Department of Cerebrovascular Diseases, Fondazione IRCCS Istituto Neurologico “Carlo Besta”, Milano, Italy
- 233 Karolinska Institutet, MEB, Stockholm, Sweden
- 234 University of Tartu, Estonian Genome Center, Tartu, Estonia, Tartu, Estonia
- 235 Department of Clinical and Experimental Sciences, Neurology Clinic, University of Brescia, Italy
- 236 Translational Genomics Unit, Department of Oncology, IRCCS Istituto di Ricerche Farmacologiche Mario Negri, Milano, Italy
- 237 Department of Genetics, Microbiology and Statistics, University of Barcelona, Barcelona, Spain
- 238 Psychiatric Genetics Unit, Group of Psychiatry, Mental Health and Addictions, Vall d'Hebron Research Institute (VHIR), Universitat Autònoma de Barcelona, Biomedical Network Research Centre on Mental Health (CIBERSAM), Barcelona, Spain
- 239 Department of Neurology, IMIM-Hospital del Mar, and Universitat Autònoma de Barcelona, Spain
- 240 IMIM (Hospital del Mar Medical Research Institute), Barcelona, Spain
- 241 National Institute for Health Research Comprehensive Biomedical Research Centre, Guy's & St. Thomas' NHS Foundation Trust and King's College London, London, UK
- 242 Division of Health and Social Care Research, King's College London, London, UK
- 243 FIMM-Institute for Molecular Medicine Finland, Helsinki, Finland
- 244 THL-National Institute for Health and Welfare, Helsinki, Finland
- 245 Iwate Tohoku Medical Megabank Organization, Iwate Medical University, Iwate,

Japan

246 BHF Glasgow Cardiovascular Research Centre, Faculty of Medicine, Glasgow, UK

247 deCODE Genetics/Amgen, Inc., Reykjavik, Iceland

248 Icelandic Heart Association, Reykjavik, Iceland

249 Institute of Biomedicine, the Sahlgrenska Academy at University of Gothenburg, Goteborg, Sweden

250 Department of Epidemiology, University of Maryland School of Medicine, Baltimore, MD, USA

251 Institute of Cardiovascular and Medical Sciences, Faculty of Medicine, University of Glasgow, Glasgow, UK

252 Chair of Genetic Epidemiology, IBE, Faculty of Medicine, LMU Munich, Germany

253 Division of Epidemiology and Prevention, Aichi Cancer Center Research Institute, Nagoya, Japan

254 Department of Epidemiology, Nagoya University Graduate School of Medicine, Nagoya, Japan

255 University Medicine Greifswald, Institute for Community Medicine, SHIP-KEF, Greifswald, Germany

256 Department of Neurology, Caen University Hospital, Caen, France

257 University of Caen Normandy, Caen, France

258 Department of Internal Medicine, Erasmus University Medical Center, Rotterdam, Netherlands

259 Landspítali University Hospital, Reykjavik, Iceland

## Supplementary figures & tables

Overview of datasets for the analysis of predicted F11 loss-of-function (LOF) variants

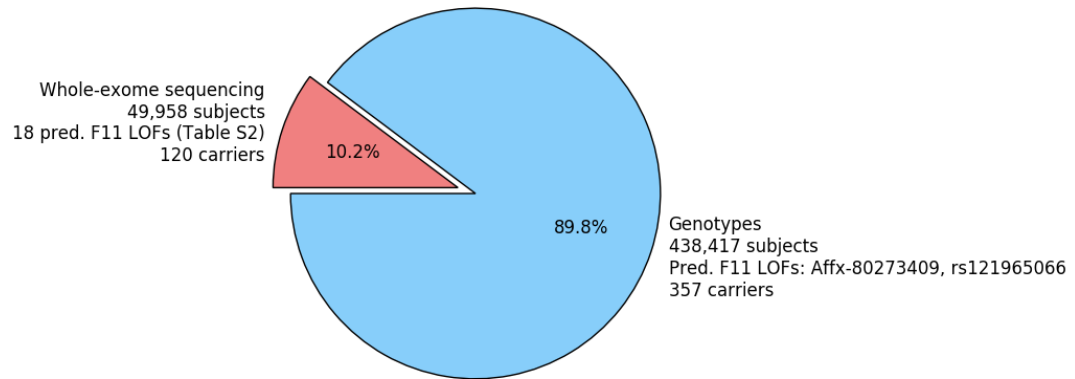

**Figure I: Overview of genetic data for analysis of predicted F11 loss-of-function variants**

In total 477 carriers of predicted F11 loss-of-function variants were identified in the whole-exome sequence and genotype datasets.

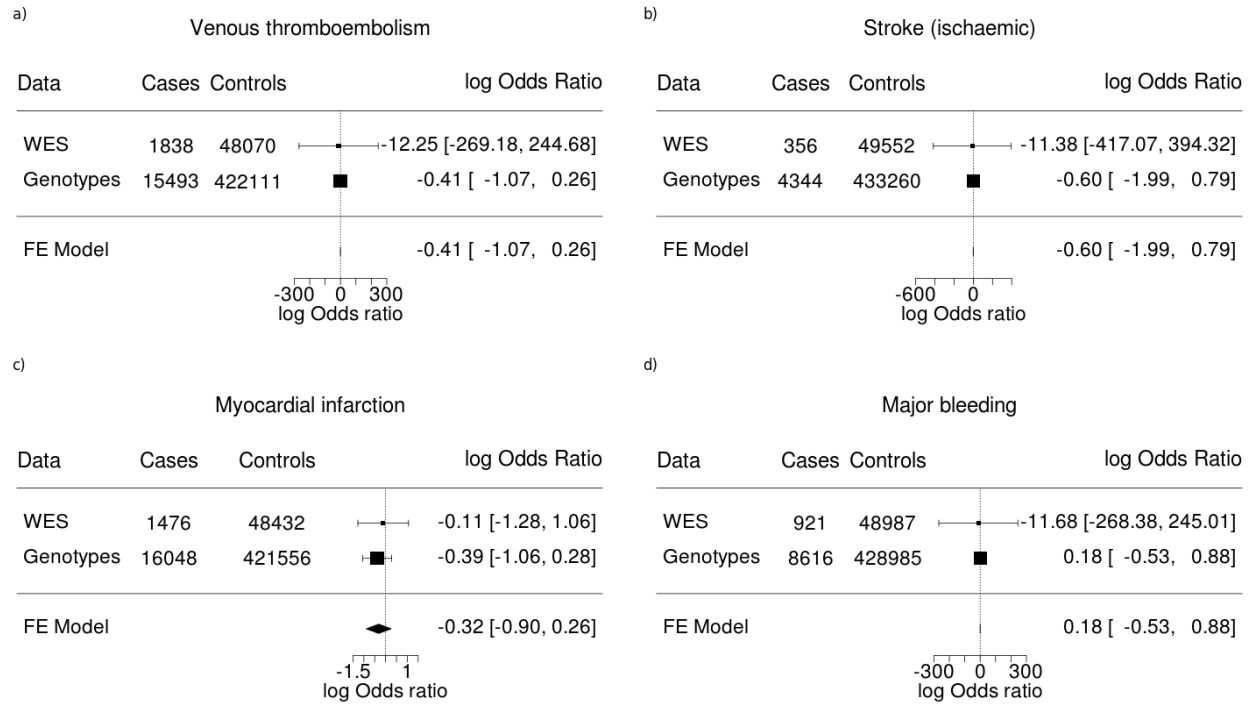

**Figure II: Fixed-effect meta-analysis of predicted F11 loss-of-function variants**

Loss-of-function (LOF) variant carriers vs. non-carriers were analyzed in genotype and whole-exome sequence (WES) datasets separately. Effects from both datasets were combined by fixed-effect meta-analysis.

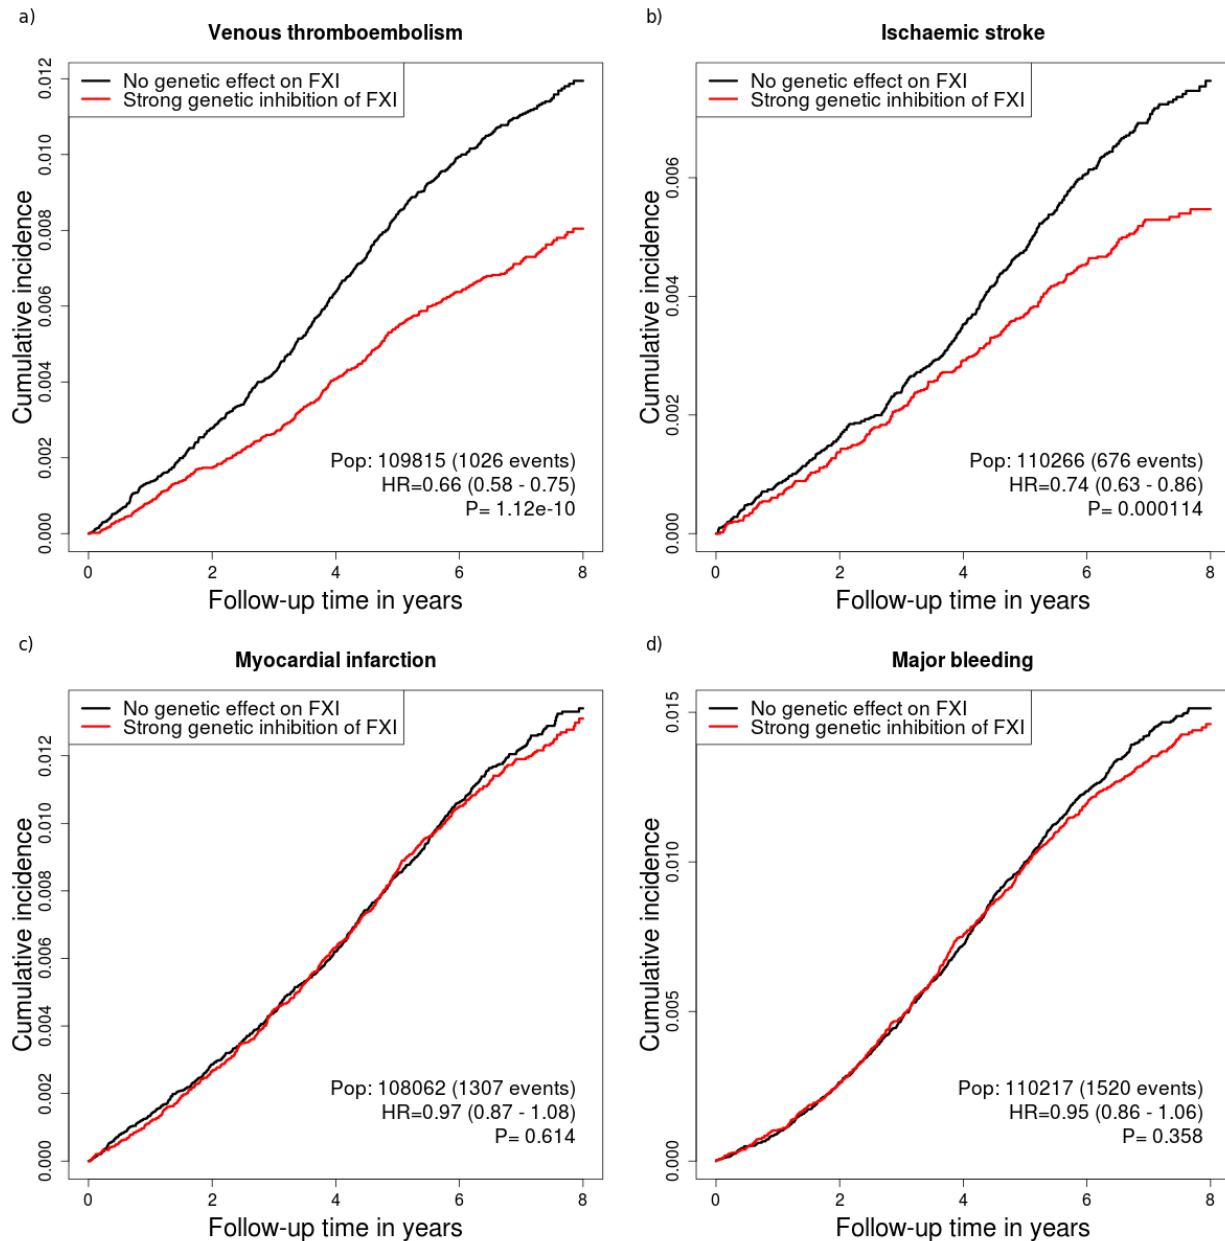

**Figure III: Prospective analyses of for primary efficacy and safety endpoints in UK Biobank for two extreme groups of the FXI genetic score.** The two groups correspond to all subjects without an aPTT lowering allele in our genetic score (~60k subjects, black) and all subjects with a strong effect on aPTT (> 1.4s, ~50k subjects, red). Size of base populations differed for the endpoints pre-defined by UK Biobank (b,c) or derived from the hospital episode data (a,d). In each case subjects with events before the start of the observation period were dropped from the analysis. We observed significant associations for venous thromboembolism (a) (HR=0.66 (0.58- 0.75), P=1.12x10<sup>-10</sup>) and ischemic stroke (b) (HR=0.74 (0.63-0.86), P=0.000114) but not myocardial infarction (c) or major bleeding (d).

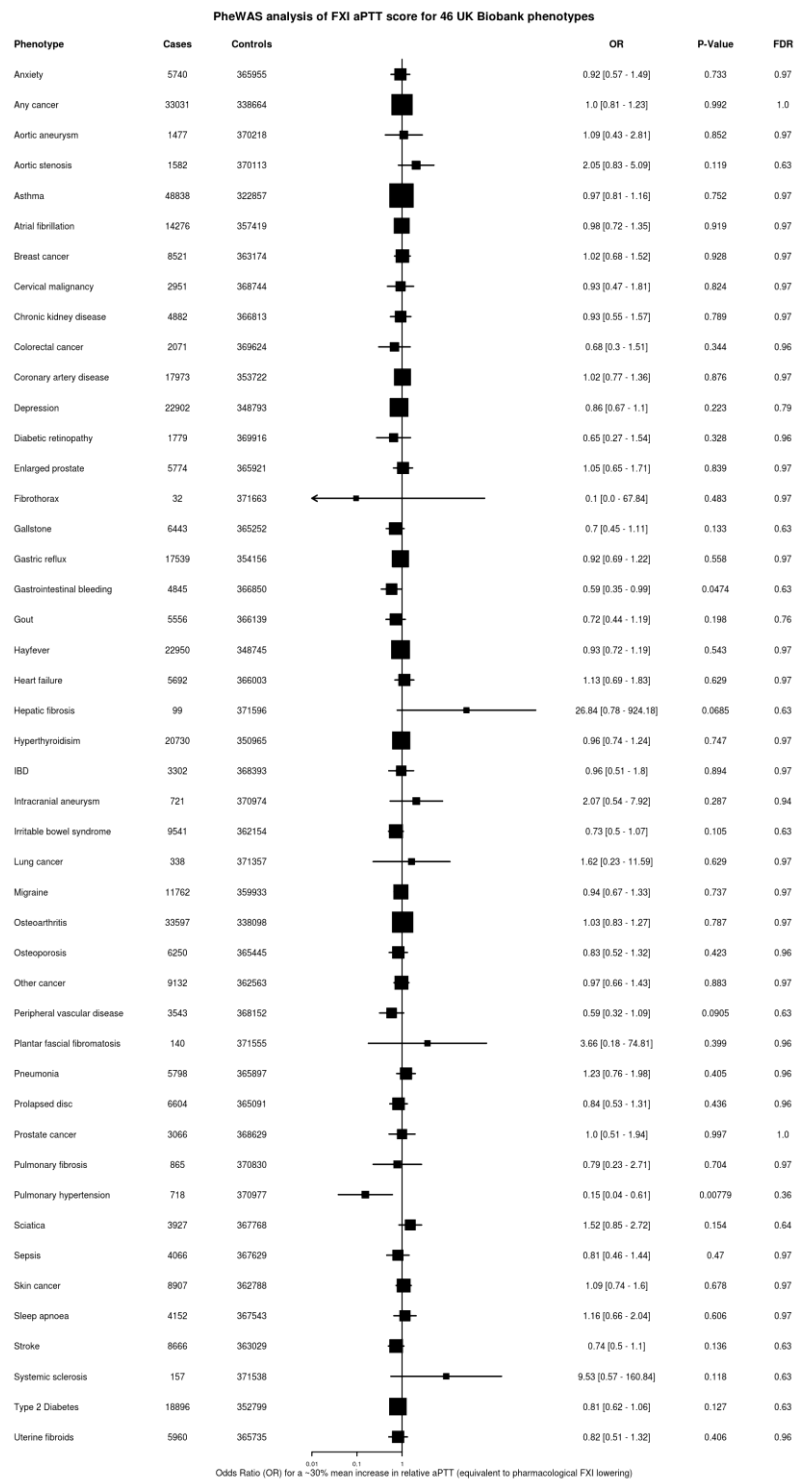

**Figure IV:** PheWAS analysis of F11 aPTT score in the UK Biobank. Cross-sectional association analysis by logistic regression of 46 phenotypes did not identify additional associations after accounting for multiple testing by False Discovery Rate <sup>20</sup>.

### Cox regression analysis of FXI aPTT score for all cause mortality

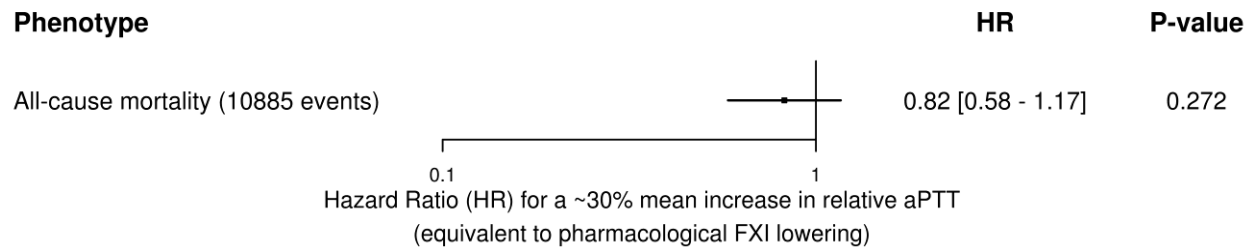

**Figure V:** Cox proportional hazard regression analysis all-cause mortality in the UK Biobank did not show a significant effect of the FXI aPTT score.

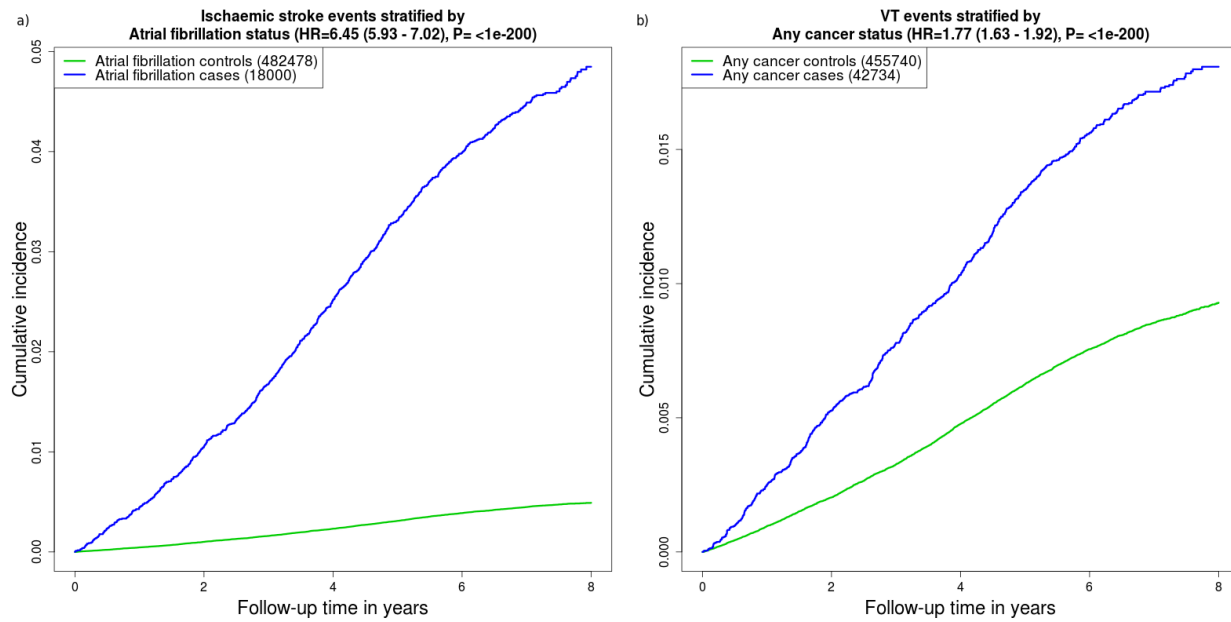

**Figure VI: Prospective analyses of risk impact of strongest identified factors.**

a) Effect of atrial fibrillation (AF) diagnosis on incidence of ischaemic stroke. AF case status confers major increase in ischaemic stroke risk (HR=6.45 (5.93-7.02), P<1e-200). b) Effect of any cancer diagnosis on incidence of venous thromboembolism. Cancer case status confers a major increase in VTE risk (HR=1.77 (1.63-1.92), P<1e-200).



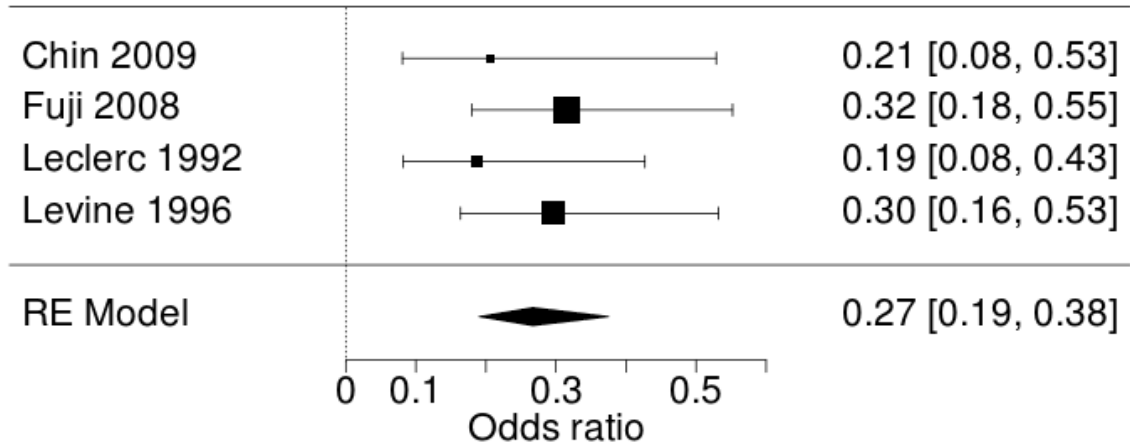

**Figure VII:** Random effect meta-analysis of four studies of Endoxaparin vs. Placebo in venous thromboembolism after total knee arthroplasty. A combined risk reduction of OR=0.27 (CI 0.19 – 0.38) was observed.

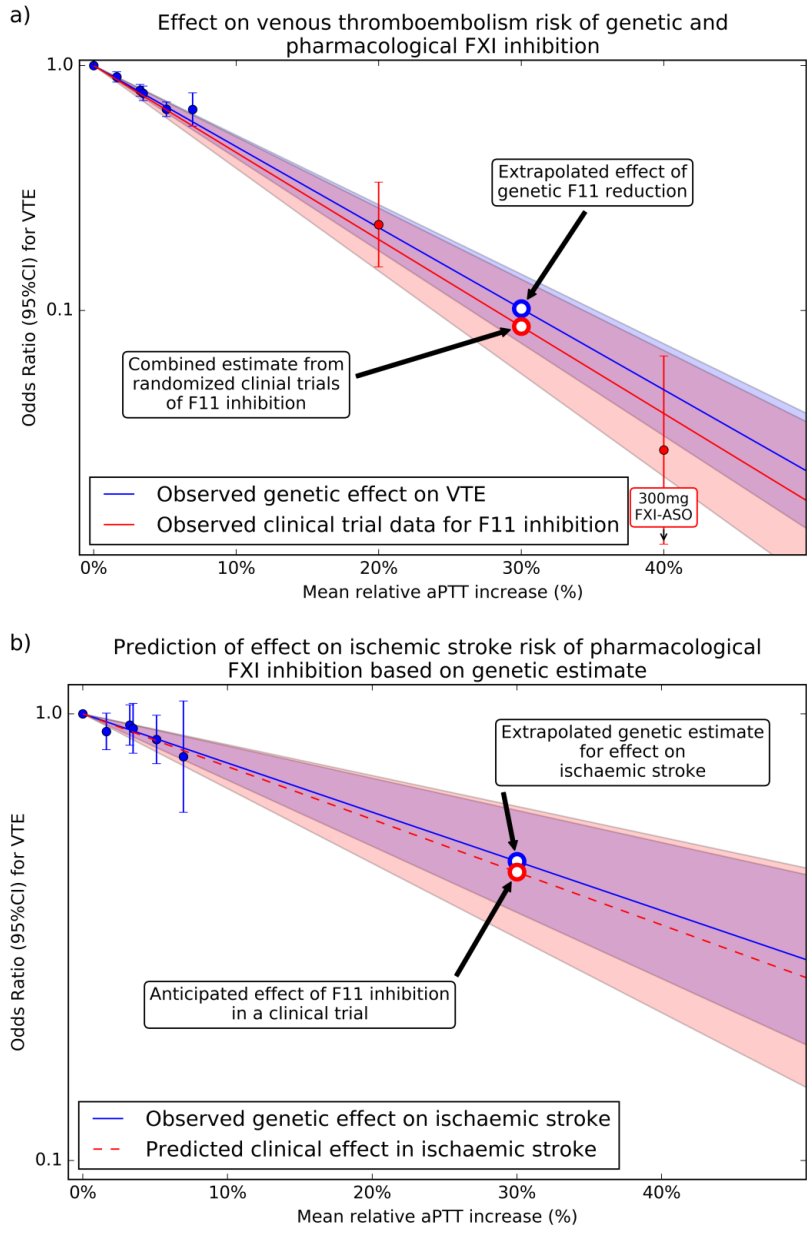

**Figure VIII: Anticipation of achievable clinical effect of FXI inhibition on ischemic stroke.**

a) Comparison of effects for genetic (blue) and pharmacological (red) modulation of F11 on venous thrombosis risk, enabling derivation of a calibration factor of 0.93 (SE 0.11). b) Application of the calibration factor to the genetic risk estimate for ischemic stroke (blue) to predict achievable effects with pharmacological modulation (red) yields a predicted odds ratio of OR=0.44 (CI 0.31 – 0.62) for a pharmacological intervention equivalent to a relative increase in aPTT of 30%.

**Supplemental Table I:** Definitions of clinical endpoints based on UKB EHR records. ICD10 and ICD9 codes were checked in UKB primary and secondary diagnoses data fields (data fields 41202&41204 and 41203&41205 for ICD10 and ICD9 respectively, primary and secondary causes of death (ICD10 coded, UKB data fields 40001&40002), OPCS operation codes were checked against UKB data fields 41210&41200. “UKB baseline codes” refer to UKB data fields 20001 (for non-cancer) and 20002 (for cancer). “OP code, self reported” corresponds to UKB data field 20004. Additional UKB data fields used are referenced directly within the table.

| Phenotype       | UK Biobank codes                                                                                                                                                                                                                                                                                                                                                                                                                                                                                                   |
|-----------------|--------------------------------------------------------------------------------------------------------------------------------------------------------------------------------------------------------------------------------------------------------------------------------------------------------------------------------------------------------------------------------------------------------------------------------------------------------------------------------------------------------------------|
| Anxiety         | UKB baseline: 1287                                                                                                                                                                                                                                                                                                                                                                                                                                                                                                 |
| Any cancer      | UKB baseline: 1001, 1002, 1003, 1004, 1005, 1006, 1007, 1008, 1009, 1010, 1011, 1012, 1015, 1016, 1017, 1018, 1019, 1020, 1021, 1022, 1023, 1024, 1025, 1026, 1027, 1028, 1029, 1030, 1031, 1032, 1033, 1034, 1035, 1036, 1037, 1038, 1039, 1040, 1041, 1042, 1043, 1044, 1045, 1046, 1047, 1048, 1050, 1051, 1052, 1053, 1055, 1056, 1058, 1059, 1060, 1061, 1062, 1063, 1064, 1065, 1066, 1067, 1068, 1070, 1071, 1072, 1073, 1074, 1075, 1076, 1077, 1078, 1079, 1080, 1081, 1082, 1084, 1085, 1086, 1087, 1088 |
| Aortic aneurysm | UKB baseline: 1492, 1591, 1592<br>ICD10: I71<br>ICD9: 4410, 4411, 4414, 4416<br>OPCS: L464, L271, L272, L274, L275, L276, L278, L279, L281, L283, L284, L285, L286, L288, L289, L181, L182, L183, L184, L185, L186, L188, L189, L191, L192, L193, L194, L195, L196, L198, L199<br>OP code, self-reported: 1104                                                                                                                                                                                                     |
| Aortic stenosis | UKB baseline: 1490<br>ICD10: I350                                                                                                                                                                                                                                                                                                                                                                                                                                                                                  |

|                         |                                                                                                                                                                                                                                                                                                  |
|-------------------------|--------------------------------------------------------------------------------------------------------------------------------------------------------------------------------------------------------------------------------------------------------------------------------------------------|
| Asthma                  | UKB baseline: 1111<br>ICD10: J45<br>UKB Field 6152 "Blood clot, DVT, bronchitis, emphysema, asthma, rhinitis, eczema, allergy diagnosed by doctor" = 8 (Asthma)                                                                                                                                  |
| Atrial fibrillation     | UKB baseline: 1483, 1471<br>ICD10: I48.4, I48.2, I48.3, I48.0, I48.1, I48.9, I48<br>ICD9: 4273<br>OPCS: K62.4, K57.1, K62.1, K62.2, K62.3<br>OP code, self reported: 1524                                                                                                                        |
| Breast cancer           | UKB baseline: 1002                                                                                                                                                                                                                                                                               |
| Cervical malignancy     | UKB baseline: 1041, 1072                                                                                                                                                                                                                                                                         |
| Chronic kidney disease  | UKB baseline: 1520, 1193, 1192, 1519, 1607<br>ICD10: N18.8, I12.0, N18.2, N18.3, N18, N18.1, I13.2, N18.4, I13.1, N18.9, N18.5, N18.0<br>ICD9: 585, 5859<br>OPCS: M01.3, M01.2, M01.1, M01.5, M01.4, M01.9, M01.8, M01<br>OP code, self reported: 1195                                           |
| Colorectal cancer       | UKB baseline: 1020, 1022, 1023                                                                                                                                                                                                                                                                   |
| Coronary artery disease | OPCS: K50.2, K49.1, K49.2, K49.9, K49.8, K75.4, K40.4, K75.1, K75.2, K75.3, K75.8, K75.9, K45.5, K45.4, K45.1, K45.3, K45.2, K40.1, K41.1, K41.3, K41.2, K41.4, K40.2, K40.3<br>UKB data field 42001 "Adjudicated MI phenotype" = 0 (Self-report only), 1 (Hospital admission) or 2 (Death only) |
| Depression              | UKB baseline: 1286                                                                                                                                                                                                                                                                               |
| Diabetic retinopathy    | UKB baseline: 1276                                                                                                                                                                                                                                                                               |

|                           |                                                                                                                                                                                                |
|---------------------------|------------------------------------------------------------------------------------------------------------------------------------------------------------------------------------------------|
|                           | ICD10: E103, E113                                                                                                                                                                              |
| Enlarged prostate         | UKB baseline: 1396                                                                                                                                                                             |
| Fibrothorax               | ICD10: J94.1                                                                                                                                                                                   |
| Gallstone                 | UKB baseline: 1162                                                                                                                                                                             |
| Gastric reflux            | UKB baseline: 1138                                                                                                                                                                             |
| Gastrointestinal bleeding | UKB baseline: 1191<br>ICD10: K922<br>ICD9: 5789                                                                                                                                                |
| Gout                      | UKB baseline: 1466                                                                                                                                                                             |
| Hayfever                  | UKB baseline: 1387                                                                                                                                                                             |
| Heart failure             | UKB baseline: 1076, 1079<br>ICD10: I43.8, I43.0, I43.2, I42.8, I42.9,<br>I43.1, I13.2, I42.6, I42.7, I42.0, I13.0,<br>I50.1, I50.0, I42.5, I11.0, I50.9, I25.5<br>ICD9: 4289, 4280, 4281, 4254 |
| Hepatic fibrosis          | ICD10: K74.0                                                                                                                                                                                   |
| Hyperthyroidism           | UKB baseline: 1225, 1226                                                                                                                                                                       |
| IBD                       | UKB baseline: 1461, 1462, 1463                                                                                                                                                                 |
| Intracranial aneurysm     | UKB baseline: 1425<br>ICD10: I671, I607<br>ICD9: 4373, 74780<br>OPCS: L331, L332, L333, L334, L338                                                                                             |
| Irritable bowel syndrome  | UKB baseline: 1154                                                                                                                                                                             |
| Lung cancer               | UKB baseline: 1001, 1027, 1028                                                                                                                                                                 |
| Major bleeding            | UKB baseline: 1191, 1491, 1445, 1083,                                                                                                                                                          |

|                              |                                                                                                                                                                                                                                                                                                                                                                                                                                                           |
|------------------------------|-----------------------------------------------------------------------------------------------------------------------------------------------------------------------------------------------------------------------------------------------------------------------------------------------------------------------------------------------------------------------------------------------------------------------------------------------------------|
|                              | 1086<br>ICD10: H45.0, H35.6, I31.2, K25.2,<br>K25.0, S06.60, I60, H43.1, I62, K92.2,<br>S06.40, S06.50, K26.0, K26.2, I61<br>ICD9: 4321, 4309, 5310, 5789, 5320                                                                                                                                                                                                                                                                                           |
| Migraine                     | UKB baseline: 1265                                                                                                                                                                                                                                                                                                                                                                                                                                        |
| Myocardial infarction        | Cases identified by UKB data field 42000<br>"Date of first myocardial infarction"                                                                                                                                                                                                                                                                                                                                                                         |
| Osteoarthritis               | UKB baseline: 1465                                                                                                                                                                                                                                                                                                                                                                                                                                        |
| Osteoporosis                 | UKB baseline: 1309                                                                                                                                                                                                                                                                                                                                                                                                                                        |
| Other cancer                 | UKB baseline: 1004, 1005, 1006, 1007,<br>1008, 1009, 1010, 1011, 1012, 1015,<br>1016, 1017, 1018, 1019, 1021, 1024,<br>1025, 1026, 1029, 1030, 1031, 1032,<br>1033, 1034, 1035, 1036, 1037, 1038,<br>1039, 1040, 1042, 1043, 1045, 1046,<br>1047, 1048, 1050, 1051, 1052, 1053,<br>1055, 1056, 1058, 1063, 1064, 1065,<br>1066, 1067, 1068, 1070, 1071, 1073,<br>1074, 1075, 1076, 1077, 1078, 1079,<br>1080, 1081, 1082, 1084, 1085, 1086,<br>1087, 1088 |
| Peripheral vascular disease  | UKB baseline: 1067, 1087<br>ICD10: I74, I1739                                                                                                                                                                                                                                                                                                                                                                                                             |
| Plantar fascial fibromatosis | ICD10: M72.2                                                                                                                                                                                                                                                                                                                                                                                                                                              |
| Pneumonia                    | UKB baseline: 1398<br>ICD10: B01.2, B05.2, J10.0, J11.0, J18,<br>J12, J13, J14, J15, J16, J17, J18, J85.1<br>ICD9: 0551, 4809, 4809, 4808, 4802,<br>4801, 4800, 4819, 4820, 4821, 4822,<br>4823, 4824, 4828, 4829, 4839, 4869,<br>4859, 4870                                                                                                                                                                                                              |
| Prolapsed disc               | UKB baseline: 1312                                                                                                                                                                                                                                                                                                                                                                                                                                        |

|                        |                                                                                                                                                                                        |
|------------------------|----------------------------------------------------------------------------------------------------------------------------------------------------------------------------------------|
|                        |                                                                                                                                                                                        |
| Prostate cancer        | UKB baseline: 1044                                                                                                                                                                     |
| Pulmonary fibrosis     | UKB baseline: 1121<br>ICD10: J84.1<br>UKB data field 22135 "Doctor diagnosed PF (work environment online follow-up)" = 1                                                               |
| Pulmonary hypertension | ICD10: I27                                                                                                                                                                             |
| Sciatica               | UKB baseline: 1476                                                                                                                                                                     |
| Sepsis                 | UKB baseline: 1657<br>ICD10: A40, A41, B377, A021, A327, P369<br>ICD9: 0380, 0381, 0384, 0388, 0389                                                                                    |
| Skin cancer            | UKB baseline: 1060, 1003, 1059, 1060, 1061, 1062                                                                                                                                       |
| Sleep apnoea           | UKB baseline: 1121<br>ICD10: G473                                                                                                                                                      |
| Stroke                 | UKB data field 42006 "Date of first stroke"                                                                                                                                            |
| Systemic sclerosis     | ICD10: M34                                                                                                                                                                             |
| Type 2 Diabetes        | UKB baseline: 1223<br>ICD10: E10<br>UKB data field 2443 "Diabetes diagnosed by doctor"=1 or UKB data field 6177 "Medication for cholesterol, blood pressure or diabetes" = 3 (Insulin) |
| Uterine fibroids       | UKB baseline: 1351                                                                                                                                                                     |
| Venous thromboembolism | UKB baseline: 1093, 1094, 1068<br>ICD10: I26, I80-I82                                                                                                                                  |

**Table II:** High confidence FXI loss-of-function variants identified in 50k whole-exome sequences from the UK Biobank

| <b>UKB WES SNP ID</b> | <b>Position (B38)</b> | <b>SNP ID</b> | <b>Impact</b>        |
|-----------------------|-----------------------|---------------|----------------------|
| 4:186273071:G:A       | chr4:186273071        | rs762013077   | stop_gained          |
| 4:186273178:G:A       | chr4:186273178        | rs140190776   | splice_donor_variant |
| 4:186274193:G:T       | chr4:186274193        | COSM5866154   | stop_gained          |
| 4:186274198:C:A       | chr4:186274198        | COSM6166867   | stop_gained          |
| 4:186274228:C:A       | chr4:186274228        | rs121965066   | stop_gained          |
| 4:186274277:T:C       | chr4:186274277        | rs1464239583  | splice_donor_variant |
| 4:186276392:T:C       | chr4:186276392        | rs1220869989  | splice_donor_variant |
| 4:186280094:I:4       | chr4:186280094        | NA            | frameshift_variant   |
| 4:186280262:D:1       | chr4:186280262        | rs1263707656  | frameshift_variant   |
| 4:186280274:D:1       | chr4:186280274        | COSM3602612   | frameshift_variant   |
| 4:186280315:D:2       | chr4:186280315        | rs1352561237  | frameshift_variant   |
| 4:186280374:C:A       | chr4:186280374        | rs745901569   | stop_gained          |
| 4:186280516:D:1       | chr4:186280516        | rs1391198995  | frameshift_variant   |
| 4:186285809:C:G       | chr4:186285809        | NA            | stop_gained          |
| 4:186285814:G:T       | chr4:186285814        | COSM5778326   | splice_donor_variant |
| 4:186286423:C:T       | chr4:186286423        | rs375422404   | stop_gained          |
| 4:186287822:D:1       | chr4:186287822        | NA            | frameshift_variant   |
| 4:186288560:C:A       | chr4:186288560        | CM051918      | stop_gained          |



Supplemental Table III: Results of the interaction analysis for venous thromboembolism

| Putative risk factor        | Number individuals with risk factor present | Survival analysis                                        |             |                    |                                                    |             |             |                                                     |             |     | Cross-sectional analysis                                  |             |                    |                                                     |             |                    |                                                      |             |             |
|-----------------------------|---------------------------------------------|----------------------------------------------------------|-------------|--------------------|----------------------------------------------------|-------------|-------------|-----------------------------------------------------|-------------|-----|-----------------------------------------------------------|-------------|--------------------|-----------------------------------------------------|-------------|--------------------|------------------------------------------------------|-------------|-------------|
|                             |                                             | Venous thrombosis events in individuals with risk factor |             |                    | Venous thrombosis events for genetically lower F11 |             |             | Venous thrombosis events - interaction between risk |             |     | Risk of venous thrombosis in individuals with risk factor |             |                    | Risk of venous thrombosis for genetically lower F11 |             |                    | Risk of venous thrombosis - interaction between risk |             |             |
|                             |                                             | HR                                                       | P-value     | FDR                | HR                                                 | P-value     | FDR         | HR ratio                                            | P-value     | FDR | OR                                                        | P-value     | FDR                | OR                                                  | P-value     | FDR                | Effect size (beta)                                   | P-value     | FDR         |
| Peripheral vascular disease | 3543                                        | 3.746242655                                              | 0           | 0                  | 3.142251542                                        | 0.453975658 | 1           | 33.90741219                                         | 0.023168974 | 1   | 5.012019796                                               | 4.2822E-273 | <b>8.3567E-271</b> | 0.13336242                                          | 0.016724845 | 0.199879226        | 0.539738631                                          | 0.850182325 | 1           |
| Sepsis                      | 4095                                        | 9.28059998                                               | 0           | 0                  | 0.106649931                                        | 0.026716466 | 0.81684551  | 1.99617026                                          | 0.864032724 | 1   | 4.709368608                                               | 8.2264E-273 | <b>8.3567E-271</b> | 0.095939054                                         | 0.003755363 | 0.06930748         | 0.03813855                                           | 0.98895386  | 1           |
| Heart failure               | 5692                                        | 3.818480998                                              | 0           | 0                  | 0.244154791                                        | 0.243637445 | 1           | 2.586467866                                         | 0.449126176 | 1   | 3.137707099                                               | 1.6484E-161 | <b>1.1163E-159</b> | 0.323535737                                         | 0.056613367 | 0.426000101        | 2.990487855                                          | 0.252897669 | 1           |
| Stroke                      | 8666                                        | 2.589395015                                              | 0           | 0                  | 0.408501713                                        | 0.457311754 | 1           | 4.022253785                                         | 0.263375044 | 1   | 2.679144179                                               | 2.1766E-156 | <b>1.1055E-154</b> | 0.228277601                                         | 0.026564797 | 0.269855321        | 2.836695555                                          | 0.215554567 | 1           |
| Chronic kidney disease      | 4882                                        | 4.393308531                                              | 0           | 0                  | 0.156972312                                        | 0.124557655 | 1           | 1.579938999                                         | 0.714180893 | 1   | 3.208153442                                               | 1.2582E-151 | <b>5.1126E-150</b> | 0.179921364                                         | 0.034176894 | 0.294837904        | 2.067073282                                          | 0.454210564 | 1           |
| Atrial fibrillation         | 14276                                       | 2.755557629                                              | 0           | 0                  | 0.340047277                                        | 0.220765271 | 1           | 4.2209119                                           | 0.12592236  | 1   | 2.18988872                                                | 1.2448E-134 | <b>4.2151E-133</b> | 0.08035258                                          | 7.09344E-06 | 0.00036029         | -0.71279221                                          | 0.713818491 | 1           |
| Major bleeding              | 7957                                        | 2.845846526                                              | 0           | 0                  | 0.017674399                                        | 0.001394428 | 0.099479542 | 0.147420629                                         | 0.142232319 | 1   | 2.336851225                                               | 9.111E-93   | <b>2.64437E-91</b> | 0.032158834                                         | 9.84372E-06 | 0.000399985        | -4.29675263                                          | 0.10285667  | 1           |
| Any cancer                  | 33031                                       | 1.767835375                                              | 0           | 0                  | 0.12079657                                         | 0.009105869 | 0.487214654 | 1.155281576                                         | 0.869874953 | 1   | 1.578427348                                               | 5.2088E-73  | <b>1.17585E-71</b> | 0.122681218                                         | 1.56741E-06 | 0.001061949        | 0.691897555                                          | 0.66030404  | 1           |
| Coronary artery disease     | 17973                                       | 1.398605832                                              | 2.4277E-10  | <b>2.36179E-09</b> | 1.246725077                                        | 0.832151824 | 1           | 15.32269187                                         | 0.012398775 | 1   | 1.70887974                                                | 2.78284E-63 | <b>5.65382E-62</b> | 0.161045138                                         | 0.001122884 | 0.032590516        | 1.44286874                                           | 0.460452002 | 1           |
| Other cancer                | 9132                                        | 2.2045237                                                | 0           | 0                  | 0.882998127                                        | 0.921978699 | 1           | 9.371290213                                         | 0.08811694  | 1   | 1.97606477                                                | 1.41125E-62 | <b>2.60654E-61</b> | 0.187764648                                         | 0.023700203 | 0.253427036        | 2.072773882                                          | 0.413196778 | 1           |
| Type 2 Diabetes             | 18896                                       | 1.414339862                                              | 1.9556E-11  | <b>2.20285E-10</b> | 0.189479318                                        | 0.118275645 | 1           | 1.809851199                                         | 0.594807676 | 1   | 1.643833561                                               | 1.25639E-55 | <b>2.12714E-54</b> | 0.113763583                                         | 0.00012559  | <b>0.004252645</b> | 0.407799722                                          | 0.836712942 | 1           |
| Asthma                      | 48838                                       | 1.478340902                                              | 0           | 0                  | 0.24050233                                         | 0.063872557 | 1           | 2.885754073                                         | 0.20929101  | 1   | 1.438332455                                               | 1.03536E-54 | <b>1.61808E-53</b> | 0.356156548                                         | 0.009186663 | 0.124428831        | 5.056341967                                          | 0.000504155 | 0.102427884 |
| Sleep apnoea                | 4152                                        | 2.301555773                                              | 0           | 0                  | 3.281718741                                        | 0.520335757 | 1           | 36.40984517                                         | 0.05553815  | 1   | 2.354891882                                               | 1.54108E-49 | <b>2.23641E-48</b> | 0.446190027                                         | 0.447174879 | 1                  | 4.887047979                                          | 0.171765228 | 1           |
| Gastrointestinal bleeding   | 4845                                        | 2.826158857                                              | 0           | 0                  | 0.030633018                                        | 0.000489876 | 0.099479542 | 0.021735395                                         | 0.02007386  | 1   | 2.051360516                                               | 4.18564E-38 | <b>5.66924E-37</b> | 0.037489597                                         | 0.001948921 | <b>0.049494695</b> | -3.596556299                                         | 0.31518183  | 1           |
| Osteoarthritis              | 33597                                       | 1.333261662                                              | 1.04587E-10 | <b>1.1192E-09</b>  | 0.055601482                                        | 0.000929868 | 0.099479542 | 0.478923025                                         | 0.431302467 | 1   | 1.379281596                                               | 4.40458E-35 | <b>5.59293E-34</b> | 0.094076571                                         | 1.61284E-07 | <b>3.27676E-05</b> | -0.269278007                                         | 0.867231098 | 1           |
| Pneumonia                   | 5798                                        | 1.3668906                                                | 0.001635411 | <b>0.011290788</b> | 2.201394919                                        | 0.683307554 | 1           | 23.77054968                                         | 0.104657562 | 1   | 1.85501941                                                | 9.63419E-32 | <b>1.15139E-30</b> | 0.219396311                                         | 0.116534101 | 0.763740491        | 2.695631557                                          | 0.40839431  | 1           |
| Aortic aneurysm             | 1477                                        | 2.6623453                                                | 1.6653E-15  | <b>2.09658E-14</b> | 0.524014922                                        | 0.807348346 | 1           | 7.897014903                                         | 0.436298001 | 1   | 2.628385112                                               | 8.23354E-31 | <b>8.80607E-30</b> | 0.009915396                                         | 0.005025825 | 0.076850889        | -6.908673432                                         | 0.207761995 | 1           |
| Colorectal cancer           | 2071                                        | 2.18235479                                               | 1.37004E-10 | <b>1.39628E-09</b> | 0.237670088                                        | 0.582895801 | 1           | 2.217066369                                         | 0.763987518 | 1   | 3.66340941                                                | 8.15922E-31 | <b>8.80607E-30</b> | 0.104132134                                         | 0.114930162 | 0.763740491        | 0.047286006                                          | 0.92121545  | 1           |
| Pulmonary fibrosis          | 865                                         | 4.854618141                                              | 0           | 0                  | 0.004500925                                        | 0.076668659 | 1           | 0.050759865                                         | 0.309344659 | 1   | 3.003490027                                               | 3.02601E-26 | <b>3.07393E-25</b> | 0.250991798                                         | 0.476321217 | 1                  | 3.27456648                                           | 0.612816203 | 1           |
| IBD                         | 3302                                        | 1.439788287                                              | 0.006241585 | <b>0.039289359</b> | 0.011747157                                        | 0.131563755 | 1           | 0.119146837                                         | 0.468303983 | 1   | 2.000476185                                               | 8.73952E-24 | <b>8.45518E-23</b> | 0.025161786                                         | 0.005295689 | 0.076850889        | -4.609178455                                         | 0.295105536 | 1           |
| Depression                  | 22902                                       | 1.241219179                                              | 0.000276547 | <b>0.001972907</b> | 0.090378962                                        | 0.049726116 | 1           | 0.869852812                                         | 0.912452205 | 1   | 1.327376813                                               | 3.81128E-17 | <b>3.51968E-16</b> | 0.047880936                                         | 9.13156E-07 | <b>9.27618E-05</b> | -2.796702219                                         | 0.191420185 | 1           |
| Gallstone                   | 5443                                        | 1.438640224                                              | 0.000117422 | <b>0.00096657</b>  | 0.024214927                                        | 0.068119954 | 1           | 0.262063632                                         | 0.514794904 | 1   | 1.54733691                                                | 1.74078E-16 | <b>1.53769E-15</b> | 0.050186272                                         | 0.002739823 | 0.061849256        | -2.154846365                                         | 0.52171374  | 1           |
| Osteoporosis                | 6250                                        | 1.340710309                                              | 0.002060311 | <b>0.013779766</b> | 1.513182203                                        | 0.831136074 | 1           | 14.86990763                                         | 0.169558614 | 1   | 1.532058294                                               | 2.67785E-16 | <b>2.26608E-15</b> | 0.261656496                                         | 0.162066446 | 0.997741658        | 2.961659471                                          | 0.360937102 | 1           |
| Aortic stenosis             | 1582                                        | 2.249428039                                              | 3.60963E-10 | <b>3.35888E-09</b> | 0.017392484                                        | 0.140718747 | 1           | 0.24799929                                          | 0.608449511 | 1   | 2.02882094                                                | 2.49188E-15 | <b>2.02508E-14</b> | 0.019234693                                         | 0.0223037   | 0.251743862        | -5.510765385                                         | 0.338730287 | 1           |
| Breast cancer               | 8521                                        | 1.942959535                                              | 0           | 0                  | 0.046498981                                        | 0.064133402 | 1           | 0.417742782                                         | 0.605068366 | 1   | 1.462938598                                               | 1.3847E-13  | <b>1.08203E-12</b> | 0.146959033                                         | 0.029532949 | 0.285720895        | 1.209783437                                          | 0.685875146 | 1           |
| Cervical malignancy         | 2951                                        | 1.254270992                                              | 0.183846495 | 1                  | 0.003210859                                        | 0.114039099 | 1           | 0.030908588                                         | 0.336950979 | 1   | 1.663399553                                               | 3.52098E-10 | <b>2.55482E-09</b> | 0.252418015                                         | 0.36118971  | 1                  | 3.219045651                                          | 0.52234961  | 1           |
| Gastric reflux              | 17539                                       | 1.256279601                                              | 0.000189213 | <b>0.001446279</b> | 0.591652529                                        | 0.666589403 | 1           | 6.604437446                                         | 0.134661603 | 1   | 1.253756538                                               | 6.23286E-10 | <b>4.36661E-09</b> | 0.187689064                                         | 0.011306174 | 0.143565522        | 2.161844005                                          | 0.3414986   | 1           |
| Hayfever                    | 22950                                       | 0.88004734                                               | 0.081867619 | 0.461091926        | 0.106722624                                        | 0.119060949 | 1           | 1.001734025                                         | 0.999059348 | 1   | 0.798378099                                               | 6.08877E-08 | <b>3.99046E-07</b> | 0.196652783                                         | 0.032633829 | 0.294837904        | 2.251628191                                          | 0.385942038 | 1           |
| Intracranial aneurysm       | 721                                         | 2.016770478                                              | 0.00228014  | <b>0.0147879</b>   | 0.078485848                                        | 0.675444163 | 1           | 0.369748949                                         | 0.863795571 | 1   | 2.109903119                                               | 9.59876E-08 | <b>6.09424E-07</b> | 0.044409376                                         | 0.28182146  | 1                  | -6.01861698                                          | 0.523902173 | 1           |
| Prolapsed disc              | 6604                                        | 1.28029713                                               | 0.01316373  | <b>0.078259205</b> | 0.010064745                                        | 0.024711955 | 0.81684551  | 0.101939675                                         | 0.266311402 | 1   | 1.332164842                                               | 1.09834E-06 | <b>6.76204E-06</b> | 0.037580928                                         | 0.003252572 | 0.066081725        | -3.271290722                                         | 0.38143558  | 1           |
| Gout                        | 5556                                        | 1.260498664                                              | 0.017399017 | <b>0.100642624</b> | 1.42923845                                         | 0.857035371 | 1           | 11.30120537                                         | 0.225371346 | 1   | 1.335463976                                               | 2.68007E-06 | <b>1.60148E-05</b> | 0.536076453                                         | 0.58087008  | 1                  | 5.362289722                                          | 0.157393951 | 1           |
| Hyperthyroidism             | 20730                                       | 1.079219187                                              | 0.230501452 | 1                  | 0.696679601                                        | 0.77603536  | 1           | 7.691431721                                         | 0.119023722 | 1   | 1.171749746                                               | 6.0489E-06  | <b>3.51113E-05</b> | 0.348836475                                         | 0.088066508 | 0.61697456         | 4.336541769                                          | 0.042313434 | 1           |
| Irritable bowel syndrome    | 9541                                        | 0.904188131                                              | 0.332324426 | 1                  | 0.463269387                                        | 0.175388595 | 1           | 4.404488229                                         | 0.513441308 | 1   | 1.248205848                                               | 1.36882E-05 | <b>7.72499E-05</b> | 0.180828368                                         | 0.933050785 | 1                  | 8.015361073                                          | 0.010006733 | 1           |
| Uterine fibroids            | 5960                                        | 0.882012573                                              | 0.346397288 | 1                  | 5.98220186                                         | 0.502526291 | 1           | 57.88727235                                         | 0.129935928 | 1   | 1.198036229                                               | 0.00393479  | <b>0.021037419</b> | 0.036240333                                         | 0.005003054 | 0.076850889        | -3.211405628                                         | 0.416209245 | 1           |
| Skin cancer                 | 8907                                        | 1.029812573                                              | 0.746351814 | 1                  | 0.025734796                                        | 0.063491291 | 1           | 0.212903828                                         | 0.439018185 | 1   | 1.119943127                                               | 0.027741626 | 0.144517945        | 0.171324785                                         | 0.063897454 | 0.463639044        | 1.756136645                                          | 0.585243927 | 1           |
| Diabetic retinopathy        | 1779                                        | 1.747564374                                              | 5.45706E-05 | <b>0.000486639</b> | 0.07064061                                         | 0.380762124 | 1           | 0.561564022                                         | 0.85029385  | 1   | 0.794605179                                               | 0.078153118 | <b>0.387272743</b> | 0.111074911                                         | 0.188435331 | 1                  | -0.361029012                                         | 0.964482304 | 1           |
| Migraine                    | 11762                                       | 1.12030149                                               | 0.192153643 | 1                  | 0.008271335                                        | 0.01417001  | 0.605554655 | 0.065516926                                         | 0.168936106 | 1   | 1.065778242                                               | 0.204882599 | <b>0.99108286</b>  | 0.146823111                                         | 0.038177964 | 0.298327918        | 1.31354329                                           | 0.96429794  | 1           |
| Anxiety                     | 5740                                        | 1.002939916                                              | 0.998152603 | 1                  | 11.68524686                                        | 0.334367545 | 1           | 124.5331515                                         | 0.06071956  | 1   | 1.024529674                                               | 0.735326277 | 1                  | 0.354449465                                         | 0.436893362 | 1                  | 4.14653252                                           | 0.35448773  | 1           |
| Pulmonary hypertension      | 718                                         | 8.369518848                                              | 0           | 0                  | 0.255900712                                        | 0.581143214 | 1           | 4.81696072                                          | 0.542524875 | 1   | 0.92096947                                                | 0.680839195 | 1                  | 0.107472707                                         | 0.244013546 | 1                  | 2.169530576                                          | 0.860137772 | 1           |
| Sciatica                    | 3927                                        | 0.931095223                                              | 0.626301663 | 1                  | 0.5318195                                          | 0.839628419 | 1           | 4.686415525                                         | 0.620196088 | 1   | 0.953410281                                               | 0.582128718 | 1                  | 0.084929551                                         | 0.133290437 | 0.846259371        | -0.806968318                                         | 0.882898102 | 1           |

Supplemental Table IV: Results of the interaction analysis for ischaemic stroke

| Putative risk factor        | Number individuals with risk factor present | Survival analysis                                       |              |             |                                                   |             |     |                                                    |              |     | Cross-sectional analysis                                 |             |             |                                                    |             |     |                                                     |             |     |
|-----------------------------|---------------------------------------------|---------------------------------------------------------|--------------|-------------|---------------------------------------------------|-------------|-----|----------------------------------------------------|--------------|-----|----------------------------------------------------------|-------------|-------------|----------------------------------------------------|-------------|-----|-----------------------------------------------------|-------------|-----|
|                             |                                             | Ischaemic stroke events in individuals with risk factor |              |             | Ischaemic stroke events for genetically lower F11 |             |     | Ischaemic stroke events - interaction between risk |              |     | Risk of ischaemic stroke in individuals with risk factor |             |             | Risk of ischaemic stroke for genetically lower F11 |             |     | Risk of ischaemic stroke - interaction between risk |             |     |
|                             |                                             | HR                                                      | P-value      | FDR         | HR                                                | P-value     | FDR | HR ratio                                           | P-value      | FDR | OR                                                       | P-value     | FDR         | OR                                                 | P-value     | FDR | Effect size (beta) of interaction                   | P-value     | FDR |
| Atrial fibrillation         | 14276                                       | 6.449539297                                             | 0            | 0           | 0.177591452                                       | 0.020053773 | 1   | 0.677272404                                        | 0.656587805  | 1   | 5.742887704                                              | 0           | 0           | 0.323305711                                        | 0.076550719 | 1   | -2.535648465                                        | 0.297794076 | 1   |
| Heart failure               | 5692                                        | 4.936108817                                             | 0            | 0           | 0.441119099                                       | 0.510271709 | 1   | 2.265710299                                        | 0.531254667  | 1   | 4.865988505                                              | 1.4914E-166 | 1.5554E-164 | 0.561665438                                        | 0.566679189 | 1   | 0.227006738                                         | 0.948914708 | 1   |
| Coronary artery disease     | 17973                                       | 2.852306671                                             | 0            | 0           | 0.178881251                                       | 0.058321452 | 1   | 0.759485704                                        | 0.785178984  | 1   | 2.953869915                                              | 8.0378E-132 | 4.1914E-130 | 0.504046335                                        | 0.391800095 | 1   | 0.069938458                                         | 0.979018852 | 1   |
| Major bleeding              | 7957                                        | 3.948306395                                             | 0            | 0           | 1.167399397                                       | 0.905521266 | 1   | 5.191598788                                        | 0.228696094  | 1   | 3.959386527                                              | 9.3073E-118 | 3.9020E-116 | 1.187425549                                        | 0.870297923 | 1   | 2.136933187                                         | 0.561684373 | 1   |
| Chronic kidney disease      | 4882                                        | 4.231711106                                             | 0            | 0           | 1.54464481                                        | 0.762321809 | 1   | 10.58622097                                        | 0.119937563  | 1   | 4.399313776                                              | 3.0029E-115 | 1.0439E-113 | 0.666771912                                        | 0.724332439 | 1   | 1.618344108                                         | 0.683658007 | 1   |
| Peripheral vascular disease | 3543                                        | 4.257865026                                             | 0            | 0           | 0.30688259                                        | 0.467747955 | 1   | 1.519241494                                        | 0.801351825  | 1   | 4.711163666                                              | 5.5795E-101 | 1.6626E-99  | 0.177553517                                        | 0.191165908 | 1   | -3.917389381                                        | 0.386359224 | 1   |
| Venous thromboembolism      | 13563                                       | 2.534851335                                             | 0            | 0           | 0.37947018                                        | 0.443876781 | 1   | 1.651564806                                        | 0.705878926  | 1   | 2.668596663                                              | 1.08363E-71 | 2.82534E-70 | 1.175042811                                        | 0.869354888 | 1   | 2.567809024                                         | 0.465513935 | 1   |
| Type 2 Diabetes             | 18896                                       | 2.156054462                                             | 0            | 0           | 0.25819136                                        | 0.230854754 | 1   | 1.179903628                                        | 0.890658987  | 1   | 2.282651177                                              | 8.37039E-65 | 1.93992E-63 | 1.117464112                                        | 0.893238255 | 1   | 2.811792612                                         | 0.344861924 | 1   |
| Sepsis                      | 4095                                        | 3.736407537                                             | 0            | 0           | 1.449480996                                       | 0.833531634 | 1   | 7.444118013                                        | 0.26758793   | 1   | 3.6221137524                                             | 6.53149E-59 | 1.36237E-57 | 0.654952853                                        | 0.769870161 | 1   | 0.612898793                                         | 0.901408374 | 1   |
| Intracranial aneurysm       | 721                                         | 6.225646054                                             | 0            | 0           | 0.462734616                                       | 0.387206244 | 1   | 0.349404671                                        | 0.787919524  | 1   | 8.463249999                                              | 2.66821E-49 | 5.05952E-48 | 0.093436688                                        | 0.415348326 | 1   | -3.4000471                                          | 0.721577156 | 1   |
| Aortic stenosis             | 1582                                        | 4.014990583                                             | 0            | 0           | 0.029493842                                       | 0.149935308 | 1   | 0.141722014                                        | 0.430188855  | 1   | 3.88670398                                               | 2.21391E-35 | 3.84823E-34 | 0.252251769                                        | 0.496059835 | 1   | -2.262194924                                        | 0.72082903  | 1   |
| Aortic aneurysm             | 1477                                        | 3.114271173                                             | 0            | 0           | 6.688088356                                       | 0.488429511 | 1   | 35.18589166                                        | 0.196903812  | 1   | 3.081089725                                              | 9.63119E-22 | 1.54532E-20 | 15.33437551                                        | 0.206999981 | 1   | 11.1668445                                          | 0.120140447 | 1   |
| Depression                  | 22902                                       | 1.382536007                                             | 1.08636E-05  | 0.000116253 | 0.37775142                                        | 0.483702268 | 1   | 1.402939619                                        | 0.628823667  | 1   | 1.583428734                                              | 2.55378E-13 | 3.80444E-12 | 1.088255981                                        | 0.939753108 | 1   | 2.221611454                                         | 0.56744839  | 1   |
| Gastrointestinal bleeding   | 4845                                        | 2.029518186                                             | 3.46932E-11  | 4.36772E-10 | 0.15274597                                        | 0.432327273 | 1   | 0.045138958                                        | 0.738126582  | 1   | 2.062623611                                              | 3.08331E-13 | 4.28753E-12 | 0.076412482                                        | 0.171299464 | 1   | -7.421486312                                        | 0.243282154 | 1   |
| Sleep apnoea                | 4152                                        | 2.25697062                                              | 2.498E-14    | 3.34143E-13 | 0.43641528                                        | 0.172938547 | 1   | 1.543581581                                        | 0.848043264  | 1   | 2.064443935                                              | 1.44157E-12 | 1.87931E-11 | 1.469488652                                        | 0.836897398 | 1   | 2.952042167                                         | 0.637328026 | 1   |
| Other cancer                | 9132                                        | 1.699974418                                             | 3.81792E-10  | 4.53956E-09 | 0.09739956                                        | 0.176187994 | 1   | 0.39273703                                         | 0.597268317  | 1   | 1.689926185                                              | 1.07775E-11 | 1.32236E-10 | 0.306488898                                        | 0.399553737 | 1   | -2.257050376                                        | 0.63789016  | 1   |
| Pulmonary fibrosis          | 865                                         | 2.596416622                                             | 3.30619E-07  | 3.7242E-06  | 9.704616356                                       | 0.567172113 | 1   | 90.40197213                                        | 0.255270864  | 1   | 2.588488968                                              | 7.07728E-08 | 8.93121E-07 | 1.680109674                                        | 0.878342275 | 1   | 4.830421348                                         | 0.663678603 | 1   |
| Hayfever                    | 22950                                       | 0.751011015                                             | 0.002142609  | 0.018342645 | 0.11856354                                        | 0.272806165 | 1   | 0.485888325                                        | 0.69562364   | 1   | 0.652087309                                              | 1.48218E-06 | 1.62716E-05 | 0.184778395                                        | 0.301078622 | 1   | -4.005327841                                        | 0.471611889 | 1   |
| Hypert thyroidism           | 20730                                       | 1.267249744                                             | 0.001987821  | 0.017726584 | 1.483693478                                       | 0.798236165 | 1   | 8.320651272                                        | 0.183928109  | 1   | 1.329112008                                              | 4.84044E-05 | 0.00050482  | 1.228979502                                        | 0.865778718 | 1   | 3.025417282                                         | 0.470806638 | 1   |
| Any cancer                  | 33031                                       | 1.247790069                                             | 7.27733E-05  | 0.000741672 | 0.332515625                                       | 0.311375609 | 1   | 1.585361193                                        | 0.69317221   | 1   | 1.180362381                                              | 0.001374555 | 0.013652889 | 0.751378557                                        | 0.749777307 | 1   | 1.179616101                                         | 0.711957519 | 1   |
| Osteoporosis                | 6250                                        | 1.313445152                                             | 0.024045684  | 0.177459026 | 5.588914841                                       | 0.484782243 | 1   | 27.02464221                                        | 0.184152558  | 1   | 1.41639849                                               | 0.001795152 | 0.017020021 | 7.400136798                                        | 0.31853131  | 1   | 8.338579365                                         | 0.204065397 | 1   |
| Pneumonia                   | 5798                                        | 1.123197243                                             | 0.377151722  | 1           | 0.018446069                                       | 0.135338364 | 1   | 0.08210478                                         | 0.354783961  | 1   | 1.36953876                                               | 0.003584668 | 0.031152656 | 0.395258267                                        | 0.635642547 | 1   | -1.339898271                                        | 0.86307862  | 1   |
| Gout                        | 5556                                        | 1.191969198                                             | 0.123946823  | 0.828980619 | 0.97834822                                        | 0.776712156 | 1   | 2.485910317                                        | 0.1371716958 | 1   | 1.286810707                                              | 0.01591265  | 0.127658811 | 0.041184631                                        | 0.087613445 | 1   | -8.528016111                                        | 0.173722024 | 1   |
| IBD                         | 3302                                        | 1.599531828                                             | 0.002819906  | 0.023212412 | 0.00070399                                        | 0.044967771 | 1   | 0.004868258                                        | 0.137271813  | 1   | 1.383322691                                              | 0.032275328 | 0.2404331   | 0.001431003                                        | 0.029103512 | 1   | -19.24515115                                        | 0.054743265 | 1   |
| Asthma                      | 48838                                       | 1.163761236                                             | 0.003895838  | 0.030881339 | 0.827603737                                       | 0.860070219 | 1   | 4.444185679                                        | 0.195959754  | 1   | 1.092567092                                              | 0.070201544 | 0.504928314 | 1.96391523                                         | 0.420432543 | 1   | 4.760007611                                         | 0.113061895 | 1   |
| Uterine fibroids            | 5960                                        | 0.790437371                                             | 0.203845396  | 1           | 2.90786835                                        | 0.79128354  | 1   | 9.705130759                                        | 0.570919579  | 1   | 0.734151286                                              | 0.090388634 | 0.628107358 | 28.68394776                                        | 0.301625328 | 1   | 12.55408044                                         | 0.244858181 | 1   |
| Anxiety                     | 5740                                        | 1.155711472                                             | 0.346485135  | 1           | 8.663942228                                       | 0.508608427 | 1   | 24.47621083                                        | 0.329188376  | 1   | 1.183497209                                              | 0.214693935 | 1           | 1.338417996                                        | 0.906845671 | 1   | 2.152436955                                         | 0.79623189  | 1   |
| Breast cancer               | 8521                                        | 1.060492826                                             | 0.645839957  | 1           | 0.23788872                                        | 0.597534978 | 1   | 1.165938505                                        | 0.956233621  | 1   | 0.95285737                                               | 0.707940091 | 1           | 0.311508878                                        | 0.618550311 | 1   | -1.744388885                                        | 0.827154847 | 1   |
| Cervical malignancy         | 2951                                        | 1.05952706                                              | 0.848394406  | 1           | 0.76001955                                        | 0.957575687 | 1   | 2.039390693                                        | 0.889560691  | 1   | 1.062212086                                              | 0.800160224 | 1           | 0.151061934                                        | 0.678974329 | 1   | -3.946508248                                        | 0.78979656  | 1   |
| Colorectal cancer           | 2071                                        | 1.175808009                                             | 0.38601078   | 1           | 1.242415147                                       | 0.95791889  | 1   | 7.07141415                                         | 0.635921503  | 1   | 1.014778762                                              | 0.95863128  | 1           | 3.30292297                                         | 0.724461878 | 1   | 7.064026456                                         | 0.538404961 | 1   |
| Diabetic retinopathy        | 1779                                        | 4.253646798                                             | 0            | 0           | 0.624913273                                       | 0.84633078  | 1   | 2.663715156                                        | 0.690901713  | 1   | 1.050625409                                              | 0.818826446 | 1           | 0.861310089                                        | 0.938061757 | 1   | -15.5075196                                         | 0.271024937 | 1   |
| Gallstone                   | 6443                                        | 0.83842557                                              | 0.247094215  | 1           | 0.000813024                                       | 0.044040327 | 1   | 0.005436236                                        | 0.13787814   | 1   | 0.950945054                                              | 0.701913368 | 1           | 0.00921616                                         | 0.065180623 | 1   | -13.28033219                                        | 0.118624294 | 1   |
| Gastric reflux              | 17539                                       | 0.997289446                                             | 0.973727277  | 1           | 0.20942596                                        | 0.35309334  | 1   | 0.937488214                                        | 0.970284089  | 1   | 0.972387628                                              | 0.70936206  | 1           | 1.090849816                                        | 0.94807756  | 1   | 2.220134627                                         | 0.62809761  | 1   |
| Irritable bowel syndrome    | 9541                                        | 1.022712353                                             | 0.860364242  | 1           | 18.15325699                                       | 0.254328058 | 1   | 76.88530992                                        | 0.091682608  | 1   | 0.843165962                                              | 0.179355165 | 1           | 5.767594609                                        | 0.444173252 | 1   | 7.463210026                                         | 0.331221647 | 1   |
| Migraine                    | 11762                                       | 0.980072753                                             | 0.870135979  | 1           | 1.156048257                                       | 0.95400521  | 1   | 3.502534583                                        | 0.623399632  | 1   | 0.95695675                                               | 0.69452177  | 1           | 1.335824414                                        | 0.886706945 | 1   | 1.970116695                                         | 0.77416834  | 1   |
| Osteoarthritis              | 33597                                       | 1.193028876                                             | 0.022983692  | 0.175679347 | 0.274157945                                       | 0.251136034 | 1   | 1.184031868                                        | 0.88812903   | 1   | 1.075166492                                              | 0.174342724 | 1           | 0.547354436                                        | 0.515868785 | 1   | -0.33465886                                         | 0.918380323 | 1   |
| Prolapsed disc              | 6604                                        | 0.874821934                                             | 0.0268168047 | 1           | 2.239531924                                       | 0.791581483 | 1   | 9.064753612                                        | 0.4739876    | 1   | 0.881709888                                              | 0.346805531 | 1           | 2.053326901                                        | 0.766081702 | 1   | 4.371357546                                         | 0.588146929 | 1   |
| Pulmonary hypertension      | 718                                         | 4.501125807                                             | 0            | 0           | 10.93348095                                       | 0.478076738 | 1   | 69.26195138                                        | 0.209660033  | 1   | 0.789495231                                              | 0.565276492 | 1           | 2.258271116                                        | 0.783827255 | 1   | 20.41802301                                         | 0.450458187 | 1   |
| Sciatica                    | 3927                                        | 1.131345641                                             | 0.455697786  | 1           | 1.612218973                                       | 0.896630994 | 1   | 8.615249917                                        | 0.555230416  | 1   | 1.041455187                                              | 0.795134175 | 1           | 2.999298024                                        | 0.70261428  | 1   | 6.315047744                                         | 0.509831161 | 1   |
| Skin cancer                 | 8907                                        | 1.003555737                                             | 0.974302774  | 1           | 1.259860059                                       | 0.914699204 | 1   | 6.299146718                                        | 0.404653747  | 1   | 1.016077707                                              | 0.870981368 | 1           | 3.481854507                                        | 0.485300556 | 1   | 6.230039368                                         | 0.297172064 | 1   |

## References

1. Bycroft C, Freeman C, Petkova D, Band G, Elliott LT, Sharp K, et al. Genome-wide genetic data on ~500,000 uk biobank participants. *bioRxiv*. 2017
2. Emdin CA, Khera AV, Natarajan P, Klarin D, Won HH, Peloso GM, et al. Phenotypic characterization of genetically lowered human lipoprotein(a) levels. *Journal of the American College of Cardiology*. 2016;68:2761-2772
3. Manichaikul A, Mychaleckyj JC, Rich SS, Daly K, Sale M, Chen WM. Robust relationship inference in genome-wide association studies. *Bioinformatics*. 2010;26:2867-2873
4. Sennblad B, Basu S, Mazur J, Suchon P, Martinez-Perez A, Van Hylckama Vlieg A, et al. Genome-wide association study with additional genetic and post-transcriptional analyses reveals novel regulators of plasma factor XI levels. *Human molecular genetics*. 2017;26:637-649
5. Nikpay M, Goel A, Won HH, Hall L, Willenborg C, Kanoni S, et al. A comprehensive 1,000 genomes-based genome-wide association meta-analysis of coronary artery disease. *Nature genetics*. 2015;47:1121-1130
6. Malik R, Chauhan G, Traylor M, Sargurupremraj M, Okada Y, Mishra A, et al. Multiancestry genome-wide association study of 520,000 subjects identifies 32 loci associated with stroke and stroke subtypes. *Nature genetics*. 2018;50:524-537
7. Tang W, Schwienbacher C, Lopez L, Ben-Shlomo Y, Oudot-Mellakh T, Johnson AD, et al. Genetic associations for activated partial thromboplastin time and prothrombin time, their gene expression profiles, and risk of coronary artery disease. *American journal of human genetics*. 2012;91:152-162
8. Interleukin 1 Genetics Consortium. Cardiometabolic effects of genetic upregulation of the interleukin 1 receptor antagonist: A mendelian randomisation analysis. *The lancet. Diabetes & endocrinology*. 2015;3:243-253
9. Viechtbauer W. Conducting meta-analyses in R with the metafor package. 2010
10. Benjamini Y, Yekutieli D. The control of the false discovery rate in multiple testing under dependency. *Ann. Statist.* 2001;29:1165-1188
11. Phipson B, Smyth GK. Permutation p-values should never be zero: Calculating exact p-values when permutations are randomly drawn. *Statistical applications in genetics and molecular biology*. 2010;9:Article39
12. Lee ES, Forthofer RN. Strategies for variance estimation. *Analyzing complex survey data*. Thousand Oaks, California: SAGE Publications, Inc.; 2006.
13. Buller HR, Bethune C, Bhanot S, Gailani D, Monia BP, Raskob GE, et al. Factor XI antisense oligonucleotide for prevention of venous thrombosis. *The New England journal of medicine*. 2015;372:232-240
14. Fuji T, Ochi T, Niwa S, Fujita S. Prevention of postoperative venous thromboembolism in japanese patients undergoing total hip or knee arthroplasty: Two randomized, double-blind, placebo-controlled studies with three dosage regimens of enoxaparin. *Journal of orthopaedic science : official journal of the Japanese Orthopaedic Association*. 2008;13:442-451
15. Levine MN, Gent M, Hirsh J, Weitz J, Turpie AG, Powers P, et al. Ardeparin (low-molecular-weight heparin) vs graduated compression stockings for the prevention of venous thromboembolism. A randomized trial in patients undergoing knee surgery. *Archives of internal medicine*. 1996;156:851-856
16. Chin PL, Amin MS, Yang KY, Yeo SJ, Lo NN. Thromboembolic prophylaxis for total knee arthroplasty in asian patients: A randomised controlled trial. *Journal of orthopaedic surgery*. 2009;17:1-5
17. Leclerc JR, Geerts WH, Desjardins L, Jobin F, Laroche F, Delorme F, et al. Prevention of deep vein thrombosis after major knee surgery--a randomized, double-blind trial comparing a low

- molecular weight heparin fragment (enoxaparin) to placebo. *Thrombosis and haemostasis*. 1992;67:417-423
18. Falck-Ytter Y, Francis CW, Johanson NA, Curley C, Dahl OE, Schulman S, et al. Prevention of vte in orthopedic surgery patients: Antithrombotic therapy and prevention of thrombosis, 9th ed: American college of chest physicians evidence-based clinical practice guidelines. *Chest*. 2012;141:e278S-e325S
  19. Hasselblad V, Kong DF. Statistical methods for comparison to placebo in active-control trials. *Drug Information Journal*. 2001;35:435-449
  20. Benjamini Y, Hochberg Y. Controlling the false discovery rate: A practical and powerful approach to multiple testing. *Journal of the Royal Statistical Society. Series B (Methodological)*. 1995;57:289-300
