# Supplementary material for: Leveraging Human Genetics to Estimate Clinical Risk Reductions Achievable by Inhibiting Factor XI
Source: PubMed Central journal article supplement — Stroke. 2019 Sep 27;50(11):3004–12. doi: 10.1161/STROKEAHA.119.026545 (PMC6824502; doi:10.1161/strokeaha.119.026545), 2019-09-27
Supplement: str-50-3004-s002.pdf [file str-50-3004-s002.pdf]

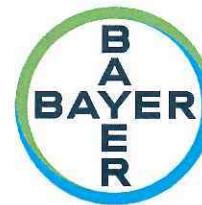

Marc Fisher, MD  
Editor-in-Chief  
Stroke: A Journal of Cerebral Circulation

**Authorization of publication STROKE/2019/026545R1**

Dear Dr. Fisher,

On behalf of Bayer I hereby authorize the publication of the article  
"Leveraging human genetics to estimate clinical risk reductions  
achievable by inhibiting Factor XI" (STROKE/2019/026545R1) in Stroke.

Best regards,

Bayer AG



Dr. Karl Ziegelbauer  
SVP Open Innovation & Digital Technologies

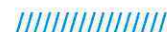

26. Juli 2019

Karl Ziegelbauer

Bayer AG  
Pharmaceuticals  
Open Innovation & Digital  
Technologies

Postadresse:  
Building 402, R. 308  
Aprather Weg 18a  
42113 Wuppertal  
Germany

Tel. +49 202 36-5293  
karl.ziegelbauer@bayer.com

www.bayer.com

Vorstand:  
Werner Baumann, Vorsitzender  
Liam Condon  
Johannes Dietsch  
Hartmut Klusik  
Kemal Malik  
Erica Mann  
Heiko Schipper  
Dieter Weinand

Vorsitzender des Aufsichtsrats:  
Werner Wenning

Sitz der Gesellschaft:  
Leverkusen  
Amtsgericht Köln  
HRB 48248
